# Supplementary material for: Is there sufficient evidence for tuning fork tests in diagnosing fractures? A systematic review
Source: PubMed Central journal article supplement — BMJ Open. 2014 Aug 4;4(8):e005238. doi: 10.1136/bmjopen-2014-005238 (PMC4127942; doi:10.1136/bmjopen-2014-005238), 2014-08-04
Supplement: bmjopen-2014-005238.draft_revisions.pdf [file bmjopen-2014-005238.draft_revisions.pdf]

# BMJ Open

## Is there sufficient evidence for tuning fork tests in diagnosing fractures? A systematic review

|                                 |                                                                                                                                                                                                                                                                                                                                                                                               |
|---------------------------------|-----------------------------------------------------------------------------------------------------------------------------------------------------------------------------------------------------------------------------------------------------------------------------------------------------------------------------------------------------------------------------------------------|
| Journal:                        | <i>BMJ Open</i>                                                                                                                                                                                                                                                                                                                                                                               |
| Manuscript ID:                  | bmjopen-2014-005238                                                                                                                                                                                                                                                                                                                                                                           |
| Article Type:                   | Research                                                                                                                                                                                                                                                                                                                                                                                      |
| Date Submitted by the Author:   | 11-Mar-2014                                                                                                                                                                                                                                                                                                                                                                                   |
| Complete List of Authors:       | Mugunthan, Kayalvili; Bond University, Center for Research in Evidence Based Practice<br>Doust, Jenny; Bond University, Center for Research in Evidence Based Practice, Faculty of Health Sciences and Medicine<br>Kurz, Bodo; CAU zu Kiel, Anatomisches Institut<br>Glasziou, Paul; Bond University, Center for Research in Evidence Based Practice, Faculty of Health Sciences and Medicine |
| <b>Primary Subject Heading</b>: | Evidence based practice                                                                                                                                                                                                                                                                                                                                                                       |
| Secondary Subject Heading:      | Qualitative research                                                                                                                                                                                                                                                                                                                                                                          |
| Keywords:                       | Epidemiology < ONCOLOGY, Orthopaedic sports trauma < ORTHOPAEDIC & TRAUMA SURGERY, QUALITATIVE RESEARCH                                                                                                                                                                                                                                                                                       |
|                                 |                                                                                                                                                                                                                                                                                                                                                                                               |

SCHOLARONE™  
Manuscripts

**Title Page****1. Title of the article**

Is there sufficient evidence for tuning fork tests in diagnosing fractures?

A systematic review

**2. Corresponding author** Kayalvili Mugunthan

14, University Drive, Robina, QLD 4229 , Australia.

[kmugunth@bond.edu.au](mailto:kmugunth@bond.edu.au), + 61755955521

**3. Co- authors****a) Jenny Doust**

Professor of Public Health, Centre for Research in Evidence Based Practice  
Faculty of Health Sciences & Medicine, Bond University, Robina, QLD 4229 ,  
Australia

**b) Prof. Dr. Bodo Kurz**

Anatomisches Institut ,  
CAU zu Kiel,  
Olshausenstrasse 40-60  
24098 Kiel

**c) Paul Glasziou**

Director, Centre for Research in Evidence Based Practice,  
Faculty of Health Sciences & Medicine, Bond University, Robina, QLD 4229 ,  
Australia

**Key words**

Tuning fork, bone fractures, diagnostic procedures and techniques, diagnosis, sensitivity  
specificity

**Word count**

1318

## Abstract

### Objective

To determine the diagnostic accuracy of tuning fork tests for detecting fractures

### Design

Systematic review of primary studies evaluating the diagnostic accuracy of tuning fork tests for the presence of fracture.

### Data source

We searched Medline, CINAHL, AMED, EMBASE, Sports Discus, CAB Abstracts and Web of Science from commencement to November 2012. We manually searched the reference lists of any review papers and any identified relevant studies.

### Study selection and data extraction

Two reviewers independently reviewed the list of potentially eligible studies and rated the studies for quality using the QUADAS 2 tool. Data was extracted to form 2x2 contingency tables. The primary outcome measure was the accuracy of the test as measured by its sensitivity and specificity with 95% confidence intervals.

### Data synthesis

We included 6 studies (329 patients), with 2 types of tuning fork tests (pain induction, loss of sound transmission). The studies included patients with an age range of 7 to 60. The prevalence of fracture ranged from 10% to 80%. The sensitivity of the tuning fork tests was high, ranging from 75% to 100%. The specificity of the tests was highly heterogeneous, ranging from 18% to 95%.

### Conclusion

Based on the studies in this review, tuning fork tests have some value in ruling out fractures, but are not sufficiently reliable or accurate for widespread clinical use. The small numbers included in previous studies and the observed heterogeneity make generalizable conclusions difficult.

### Strength and limitations of the study

- Based on the studies in this review, tuning fork tests have value in ruling out some fractures, but current evidence is insufficient to state the circumstances when it is reliable
- Quantification of the degree and causes of heterogeneity of the studies was not feasible, because of small sample sizes and varying methods of the studies

Therefore this review does not support the current clinical use of tuning forks as a triage test for the diagnosis of fractures.

## Is there sufficient evidence for tuning fork tests in diagnosing fractures?

### A systematic review

#### Introduction

Although imaging for suspected fractures is generally cheap and readily accessible, there are situations such as remote settings, where imaging is not readily available. Other clinical tests for fracture may then assist in decision making. One test which was proposed at least 60 years ago is the use of a tuning fork.[9]

Two methods of using tuning forks to detect fractures have been developed. The first method uses a vibrating tuning fork placed directly over, or closely proximal to the suspected fracture site. Because the periosteum is heavily innervated, mechanical vibration over a fracture site stimulates the overlying periosteum, causing pain.[4] The pain stops or decreases with the removal of the tuning fork. The second method uses a vibrating tuning fork placed over a bony prominence distal to the fracture site. Using a stethoscope to listen to the sound over a bony prominence proximal to the fracture site, the fracture is detected by a reduction in the sound conducted along the bone compared to the unaffected limb.[9]

The aim of this review was to identify the techniques used to diagnose fractures using a tuning fork and assess all studies of the diagnostic accuracy of tuning fork tests for the presence of fracture.

#### Methods

The inclusion criteria for the review were primary studies that assessed the diagnostic accuracy of tuning forks, using either pain or reduction of sound as the index test, measured against a recognised reference standard, such as X-ray, MRI or bone scan for the diagnosis of fractures. We included studies that enrolled patients of all ages and in all clinical settings with no exclusion by language of publication. We excluded case series, case-control studies, and narrative review papers.

## Search Strategy

We searched Medline, CINAHL, AMED, EMBASE, Sports Discus, CAB Abstracts and Web of Science from commencement to November 2012. We also searched the reference lists of any identified studies or review papers. We also searched for any systematic reviews or meta-analyses done on this diagnostic test.

The Medline search strategy is shown in Box 1, and was run without a methodological filter.

## Data extraction and management

We selected studies in a two stage process. The titles and abstracts of all search results were screened by two authors (KM, JD) and full manuscripts for all potential relevant papers were obtained. Two review authors (KM, JD) independently reviewed each paper for inclusion according to the predefined inclusion criteria, then rated study quality and extracted relevant data. In the case of duplicate publication, we selected the most complete version of the study. We resolved disagreements through discussion with a third author (PG).

The primary outcome measure of interest was the accuracy of the test as measured by its sensitivity and specificity. Wherever possible, we used the raw data to construct 2x2 tables. 95% confidence intervals for sensitivity and specificity were calculated with the Wilson score method and 95% confidence intervals for positive and negative likelihood ratios were calculated with the method described by Simel et al (1991).<sup>[3,8]</sup> We appraised each article using the QUADAS 2 tool.<sup>[10]</sup>

## Results

### Literature identification and study quality

We identified 62 citations from the electronic and bibliographic searches. 16 articles in full text were obtained for further scrutiny. Six primary studies (329 patients) were included in the final review (Figure 1).

The characteristics of the participants and the methods of testing are shown in Table 1. Most studies included only adults; one study included paediatric patients. The prevalence of fracture ranged from 10% to 80%. Two studies used the tuning fork test to investigate any suspected fracture [4,6] one suspected femoral neck fractures,<sup>[1]</sup> one ankle inversion injuries [2] and two stress fractures.<sup>[5,11]</sup> The studies investigating any fracture, femoral or ankle fractures used X-ray as a reference standard and the studies of stress fractures used either bone scan or X-ray and bone scan as a reference standard. The study of patients with ankle inversion injuries included patients who had tested positive to the "Ottawa ankle rule".

1  
2  
3  
4  
5  
6 Four studies detected fractures by using pain induced by the vibrating tuning fork, [2,4,5,11]  
7 while two studies used reduced sound conduction .[1,6] Four studies used a 128Hz tuning fork  
8 alone[1,2,5,6] but two studies compared the diagnostic accuracy of different frequency tuning  
9 forks within the studies .[4,11]  
10

11  
12  
13  
14 The methodological quality of the included studies was modest, with important elements that  
15 may indicate a risk of bias being unclear or not reported. For example, in most studies it was  
16 either unclear or not stated whether the comparison between the tuning fork test and reference  
17 test had been blind and independent of the reference standard (Table 2).  
18  
19

20  
21  
22 Figure 2 shows sensitivity versus 1- specificity (ROC plot) for the 6 included studies. The  
23 sensitivity of the tuning fork tests was generally high, ranging from 75% to 100%. In the study to  
24 rule out fracture in patients who had tested positive to the “Ottawa ankle rule”, the use of the  
25 tuning fork on either the tip of the lateral malleolus or the distal fibula shaft gave a sensitivity of  
26 100%, albeit there were only 5 patients with fractures [9].However the specificity of the test in  
27 the six studies was highly heterogeneous, ranging from 18% to 95%.  
28  
29  
30

31  
32  
33  
34 Two studies showed reasonable overall diagnostic accuracy with diagnostic odds ratios > 10,but  
35 other studies showed only modest values (Table 3). The two studies that compared the diagnostic  
36 accuracy of different frequency tuning forks on the same patients found no differences between  
37 frequencies.[4,11] One study assessed the differences between pain ratings but differences were  
38 small. The one study that assessed inter-tester reliability showed only low reliability.[5]  
39  
40  
41

#### 42 43 44 **Discussion**

45 Two forms of tuning fork test, one based on pain induction and one on sound transmission,  
46 showed modest diagnostic accuracy with some ability to rule out fractures. However, the  
47 estimated sensitivity (ranging from 75% to 100%) is not sufficient to be relied upon to rule out  
48 fractures based on a negative test. The specificity is particularly heterogeneous, potentially  
49 resulting in a high proportion of false positive test results. The reasons for this variation in  
50 accuracy are unclear, but may be related to both the way the test is done or to characteristics of  
51 the injuries and fractures.  
52  
53  
54

55 The low inter-tester reliability suggests that the techniques would benefit from standardization  
56 and training. Wilder et al [11] compared different frequencies and found a higher induction of  
57  
58  
59  
60

1  
2  
3 fracture pain using 256Hz, but pain also occurred in patients without fractures resulting in a low  
4 specificity.  
5  
6

7  
8 Based on the results in this review, the tuning fork test was less accurate for stress fractures than  
9 other types of fractures, but a number of features of this type of injury may modify the accuracy.  
10 Lesho[5] suggests that in the early stages, stress fractures might not be identified by the tuning  
11 fork test, because the bone shell is still more or less intact. A bone scan, however, would show an  
12 increased activity in the fractured area. Timing may also affect the accuracy of the test.  
13  
14

15 A mineralized callus where fracture healing has been initiated might not be identified by these  
16 tests. It is unclear whether a discontinuity of the cortical bone is required in order to give a  
17 positive test result. Both types of tuning fork tests seem to be more accurate in diagnosing  
18 transverse fractures than other types of fractures. It also unclear whether swelling or bruising in  
19 the area of the injury might affect the results.  
20  
21

22 A systematic review[7] which examined a variety of methods for the diagnosis of stress fractures  
23 included only 2 of the 6 studies we used in this review.  
24  
25

26 In conclusion, both tuning fork methods have some discrimination ability, but current techniques  
27 are not sufficient reliable or accurate to rule in or out fractures and currently should have only  
28 limited use in clinical practice. The clinical usefulness of these tests might be in remote areas  
29 with no easy access to other options.  
30  
31  
32

33 **Box 1:**

34  
35 Ovid MEDLINE (<1948 to November Week 3  
36 2012>)

37  
38 Search Strategy:

39  
40 1 tuning fork\*.tw. (302)

41  
42 2 barford test\*.tw. (1)

43  
44 3 tf test\*.tw. (79)

45  
46 4 auscultation\*.tw. (2953)

47  
48 5 or/1-4 (3334)

49  
50 6 exp Fractures, Bone/ (133424 )

51  
52 7 fracture\*.tw. (149937)

53  
54 8 or/6-7 (187939)

55  
56 9 5 and 8 (20)  
57  
58  
59  
60

Table 1: Characteristics of the included studies

| Criterion                | Bache <sup>1</sup><br>(1984) | Moore <sup>6</sup><br>(2009)               | Lesho <sup>5</sup><br>(1997) | Kazemi <sup>4</sup><br>(2000) | Dissmann <sup>2</sup><br>(2006) | Wilder <sup>11</sup><br>(2008)   |
|--------------------------|------------------------------|--------------------------------------------|------------------------------|-------------------------------|---------------------------------|----------------------------------|
| <b>Index test</b>        | <b>Sound conduction</b>      |                                            | <b>Pain from vibration</b>   |                               |                                 |                                  |
| Number of participants   | 100                          | 37                                         | 52                           | 46                            | 49                              | 45                               |
| Age( years)              | Mean<br>79                   | Range<br>7-60                              | Mean<br>25                   | Mean<br>30                    | Range<br>12-84                  | Mean<br>31                       |
| Setting                  | Emergency department         | University sports clinic/orthopedic center | Army medical center          | Emergency department          | Emergency department            | Runners clinic                   |
| Suspected fracture type  | Femoral neck fracture        | Any fracture                               | Tibial stress fracture       | Any fracture                  | Ankle inversion injuries*       | Stress fractures in leg and feet |
| <b>Reference test</b>    | X-ray                        | X-ray                                      | Bone scan                    | Bone scan                     | X-ray                           | X-ray and bone scan              |
| Time since symptom onset | Not reported                 | < 7 days old                               | Not reported                 | 0-10 days                     | Not reported                    | Not reported                     |

\* Patients had tested positive to the 'Ottawa ankle rule'



**Table 2: Methodological quality of the included studies**

| <b>Criterion</b>                                                                               | <b>Bache<sup>1</sup><br/>(1984)</b> | <b>Moore<sup>6</sup><br/>(2009)</b> | <b>Lesho<sup>5</sup><br/>(1997)</b> | <b>Kazemi<sup>2</sup><br/>(2000)</b> | <b>Dissmann<sup>4</sup><br/>(2006)</b> | <b>Wilder<sup>11</sup><br/>(2008)</b> |
|------------------------------------------------------------------------------------------------|-------------------------------------|-------------------------------------|-------------------------------------|--------------------------------------|----------------------------------------|---------------------------------------|
| Consecutive or random sample                                                                   | Yes                                 | Yes                                 | Yes                                 | Yes                                  | Yes                                    | Yes                                   |
| Case-control study design avoided                                                              | Yes                                 | Yes                                 | Yes                                 | Yes                                  | Yes                                    | Yes                                   |
| Inappropriate exclusions avoided                                                               | Yes                                 | Yes                                 | Yes                                 | Yes                                  | Yes                                    | Yes                                   |
| Index test interpreted blind and independent of reference standard/<br>Pre-specified threshold | Unclear                             | Yes                                 | Yes                                 | Yes                                  | Yes                                    | Unclear                               |
| Appropriate reference standard                                                                 | Yes                                 | Yes                                 | Yes                                 | Yes                                  | Yes                                    | Yes                                   |
| Reference standard interpreted blind and independent of index test                             | Unclear                             | Unclear                             | Unclear                             | Yes                                  | Yes                                    | Unclear                               |
| Appropriate interval between index test and reference standard                                 | Not reported                        | Not reported                        | Within 30 days                      | Not reported                         | Not reported                           | Not reported                          |
| All patients received a reference standard/<br>same reference standard                         | Yes                                 | Yes                                 | No                                  | Yes                                  | Yes                                    | No                                    |
| All patients included in the analysis                                                          | Yes                                 | Yes                                 | No                                  | Yes                                  | Yes                                    | No                                    |

1  
2  
3  
4  
5  
6  
7  
8  
9  
10  
11  
12  
13  
14  
15  
16  
17  
18  
19  
20  
21  
22  
23  
24  
25  
26  
27  
28  
29  
30  
31  
32  
33  
34  
35  
36  
37  
38  
39  
40  
41  
42  
43  
44  
45  
46  
47  
48  
49

**Table 3: Overview of the results of the included studies**

| Results of testing                  | Bache <sup>1</sup><br>(1984) | Moore <sup>6</sup><br>(2009) | Lesho <sup>5</sup><br>(1997) | Kazemi <sup>4</sup><br>(2000) |                     | Dissmann <sup>2</sup><br>(2006) |                     | Wilder <sup>11</sup><br>(2008) |                    |                     |
|-------------------------------------|------------------------------|------------------------------|------------------------------|-------------------------------|---------------------|---------------------------------|---------------------|--------------------------------|--------------------|---------------------|
|                                     | 128Hz                        | 128Hz                        | 128Hz                        | 128Hz                         | 256Hz               | 128Hz<br>TLM                    | 128Hz<br>DFS        | 128Hz                          | 256Hz              | 512Hz               |
| Type of tuning fork                 | 128Hz                        | 128Hz                        | 128Hz                        | 128Hz                         | 256Hz               | 128Hz<br>TLM                    | 128Hz<br>DFS        | 128Hz                          | 256Hz              | 512Hz               |
| Prevalence of fractures             | 56%                          | 32%                          | 61%                          | 80%                           | 80%                 | 10%                             | 10%                 | 27%                            | 27%                | 27%                 |
| Sensitivity (%; 95% CI)             | 91<br>(81-96)                | 83<br>(55-95)                | 75<br>(57-87)                | 89<br>(75-96)                 | 89<br>(75-96)       | 92<br>(52-99)                   | 92<br>(52-99)       | 83<br>(55-95)                  | 92<br>(67-99)      | 77<br>(49-92)       |
| Specificity (%; 95% CI)             | 18<br>(9-32)                 | 80<br>(61-91)                | 67<br>(44-84)                | 44<br>(19-73)                 | 44<br>(19-73)       | 61<br>(46-74)                   | 94<br>(84-98)       | 37<br>(23-55)                  | 19<br>(9-36)       | 64<br>(47-79)       |
| Diagnostic Odd ratio                | 2.3<br>(0.7-7.5)             | 20.0<br>(3.3-122)            | 6.0<br>(1.6-22)              | 6.6<br>(1.2-35.2)             | 6.6<br>(1.2-35.2)   | 17.3<br>(0.9-332)               | 187.0<br>(7.9-4424) | 3.0<br>(0.6-16.1)              | 2.9<br>(0.3-26.7)  | 6.1<br>(1.4-26.7)   |
| Positive likelihood ratio: (95% CI) | 1.1<br>(0.94-1.3)            | 4.2<br>(1.8-9.5)             | 2.2<br>(1.1-4.5)             | 1.6<br>(0.89-2.9)             | 1.6<br>(0.89-2.91)  | 2.4<br>(1.5-3.7)                | 16.5<br>(4.8-56)    | 1.3<br>(0.92-1.9)              | 1.1<br>(0.91-1.4)  | 2.2<br>(1.2-3.8)    |
| Negative likelihood ratio: (95% CI) | 0.49<br>(0.17-1.4)           | 0.21<br>(0.06-0.75)          | 0.37<br>(0.18-0.77)          | 0.24<br>(0.08-0.79)           | 0.24<br>(0.08-0.79) | 0.14<br>(0.01-2.0)              | 0.09<br>(0.01-1.3)  | 0.45<br>(0.12-1.7)             | 0.39<br>(0.05-3.0) | 0.36<br>(0.13-0.99) |

TLM- tip of lateral malleolus ; DFS- distal fibula shaft

## Acknowledgements

We extend our gratitude to Sarah Thorning (Trial search coordinator, Bond University) for valuable help in literature search and Elaine Beller (Statistician, Bond University) for statistical support.

## Competing interest

The authors have declared no competing interest

**Funding** Kayalvili Mugunthan is supported by a Primary Health Care Research Evaluation & Development (PHCRED) fellowship, Bond University.

## Contributorship Statement:

1) substantial contributions to conception and design, acquisition of data, or analysis and interpretation of data;

Kayalvili Mugunthan  
Jenny Doust  
Paul Glaziou

2) drafting the article or revising it critically for important intellectual content;

Kayalvili Mugunthan  
Jenny Doust  
Bodo Kurz

3) final approval of the version to be published

Jenny Doust  
Paul Glaziou

D=1) substantial contributions to conception and design, acquisition of data, or analysis and interpretation of data;

Kayalvili Mugunthan  
Jenny Doust  
Paul Glaziou

2) drafting the article or revising it critically for important intellectual content;

Kayalvili Mugunthan

1  
2  
3 Jenny Doust  
4 Bodo Kurz  
5  
6

7 3)final approval of the version to be published  
8  
9

10 Jenny Doust  
11 Paul Glaziou  
12

### 13 **Data Sharing Statement**

14  
15 N/A  
16  
17  
18  
19

### 20 **References;**

- 21  
22 1. Bache JB, Cross AB. The Barford test. A useful diagnostic sign in fractures of the femoral  
23 neck. *Practitioner*.1984 Mar;**228**(1389):305-8.  
24  
25 2. Dissmann PD, Han KH. The tuning fork test: a useful tool for improving specificity in  
26 “Ottawa positive” patients after ankle inversion injury. *Emerg Med J*. 2006;**23**(10):788–90.  
27 <http://dx.doi.org/10.1136/emj.2006.035519>  
28  
29 3..<http://www.stats.org.uk/statistical-inference/Newcombe1998.pdf>.  
30  
31 4. Kazemi M, Roscoe MW. Is the tuning fork test a reliable tool in detecting acute simple  
32 fractures? *International Sports Journal*. 2000Summer;**4**(2):1-8.  
33  
34 5. Lesho EP. Can tuning forks replace bone scans for identification of tibial stress fractures? *Mil*  
35 *Med*.1997 Dec;**162**(12):802-3.  
36  
37 6. Moore MB. The use of a tuning fork and stethoscope to identify fractures. *Journal of Athletic*  
38 *Training*. 2009;**44**(3):272-4. <http://dx.doi.org/10.4085/1062-6050-44.3.272>.  
39  
40 7. Schneiders AG, Sullivan SJ, Hendrick PA et al. The ability of clinical tests to diagnose stress  
41 fractures: a systematic review and meta-analysis. *J Orthop Sports Phys Ther*.  
42 2012Sep;**42**(9):760-71. <http://dx.doi.org/10.2519/jospt.2012.4000>  
43  
44 8, Simel DL, Samsa GP, Matchar DB. Likelihood ratios with confidence: sample size estimation  
45 for diagnostic test studies. *Journal of Clinical Epidemiology*.1991;**44**:763-70.  
46  
47 9. Weisberg JL Evaluation of bone continuity by sound conduction. *Bulletin of the United States*  
48 *Army Medical Department*.1945;**4**:471-4  
49  
50  
51  
52  
53  
54  
55  
56  
57  
58  
59  
60

1  
2  
3 10. Whiting P, Rutjesw AW, Westwood M, et al.Updating QUADAS: evidence to inform the  
4 development of QUADAS-2. 2010.Accessed at  
5 [www.bris.ac.uk/quadas/resources/quadas2reportv4.pdf](http://www.bris.ac.uk/quadas/resources/quadas2reportv4.pdf) on 5 September 2011.  
6  
7

8 11.Wilder RP, Vincent HK, Stewart J et al. Clinical Use of Tuning Forks to Identify Running-  
9 Related Stress Fractures. *Athletic Training & Sports Health Care: The Journal for the Practicing*  
10 *Clinician*. 2009;**1**(1):12-8. [http://dx.doi.org /10.3928/19425864-20090101-10](http://dx.doi.org/10.3928/19425864-20090101-10)  
11  
12  
13

14  
15  
16  
17  
18  
19  
20  
21  
22  
23  
24  
25  
26  
27  
28  
29  
30  
31  
32  
33  
34  
35  
36  
37  
38  
39  
40  
41  
42  
43  
44  
45  
46  
47  
48  
49  
50  
51  
52  
53  
54  
55  
56  
57  
58  
59  
60

For peer review only

**Figure 1: Flowchart of studies included in the review**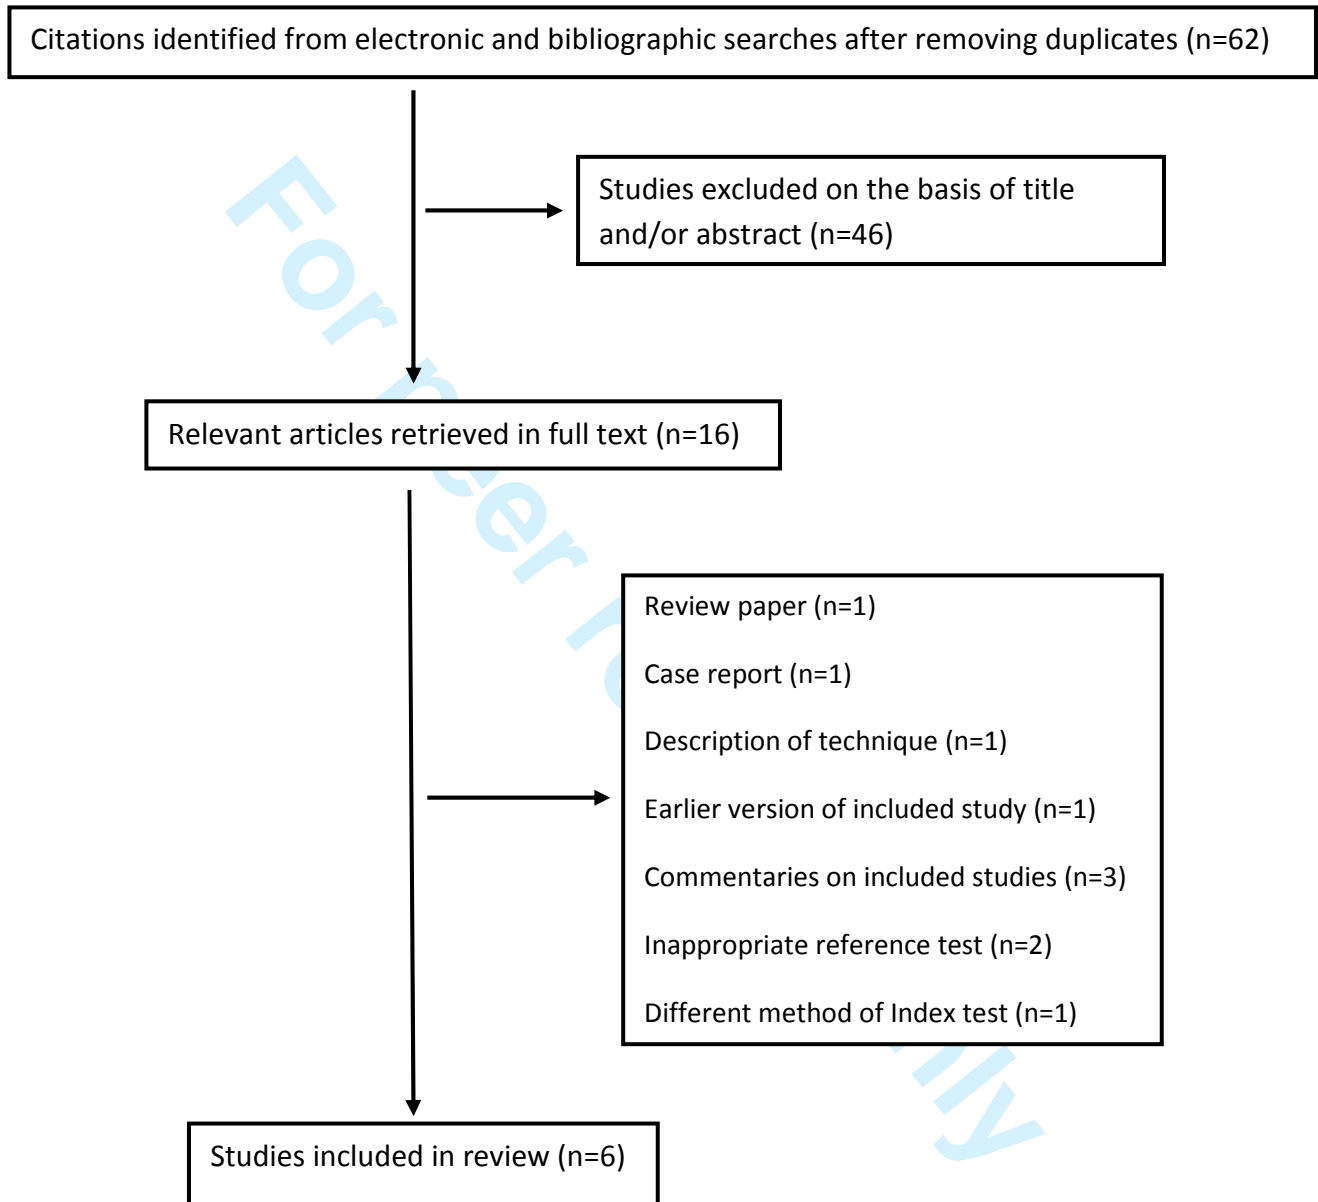

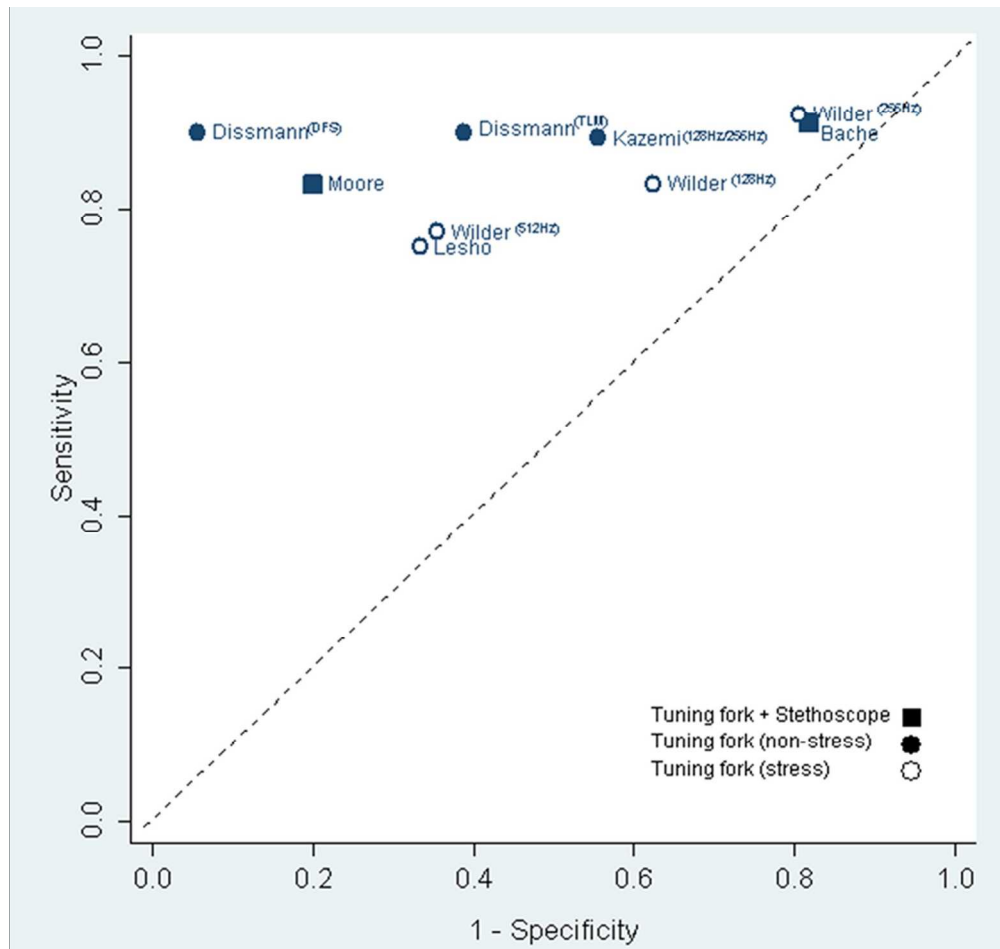

155x146mm (300 x 300 DPI)

only

1  
2  
3  
4  
5  
6  
7  
8  
9  
10  
11  
12  
13  
14  
15  
16  
17  
18  
19  
20  
21  
22  
23  
24  
25  
26  
27  
28  
29  
30  
31  
32  
33  
34  
35  
36  
37  
38  
39  
40  
41  
42  
43  
44  
45  
46  
47  
48  
49  
50  
51  
52  
53  
54  
55  
56  
57  
58  
59  
60

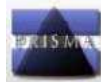

# PRISMA 2009 Checklist

1  
2  
3  
4  
5  
6  
7  
8  
9  
10  
11  
12  
13  
14  
15  
16  
17  
18  
19  
20  
21  
22  
23  
24  
25  
26  
27  
28  
29  
30  
31  
32  
33  
34  
35  
36  
37  
38  
39  
40  
41  
42  
43  
44  
45  
46  
47  
48  
49

| Section/topic                      | #  | Checklist item                                                                                                                                                                                                                                                                                              | Reported on page # |
|------------------------------------|----|-------------------------------------------------------------------------------------------------------------------------------------------------------------------------------------------------------------------------------------------------------------------------------------------------------------|--------------------|
| <b>TITLE</b>                       |    |                                                                                                                                                                                                                                                                                                             |                    |
| Title                              | 1  | Identify the report as a systematic review, meta-analysis, or both.                                                                                                                                                                                                                                         | 1                  |
| <b>ABSTRACT</b>                    |    |                                                                                                                                                                                                                                                                                                             |                    |
| Structured summary                 | 2  | Provide a structured summary including, as applicable: background; objectives; data sources; study eligibility criteria, participants, and interventions; study appraisal and synthesis methods; results; limitations; conclusions and implications of key findings; systematic review registration number. | 2                  |
| <b>INTRODUCTION</b>                |    |                                                                                                                                                                                                                                                                                                             |                    |
| Rationale                          | 3  | Describe the rationale for the review in the context of what is already known.                                                                                                                                                                                                                              | 3                  |
| Objectives                         | 4  | Provide an explicit statement of questions being addressed with reference to participants, interventions, comparisons, outcomes, and study design (PICOS).                                                                                                                                                  | 3                  |
| <b>METHODS</b>                     |    |                                                                                                                                                                                                                                                                                                             |                    |
| Protocol and registration          | 5  | Indicate if a review protocol exists, if and where it can be accessed (e.g., Web address), and, if available, provide registration information including registration number.                                                                                                                               | nil                |
| Eligibility criteria               | 6  | Specify study characteristics (e.g., PICOS, length of follow-up) and report characteristics (e.g., years considered, language, publication status) used as criteria for eligibility, giving rationale.                                                                                                      | 3                  |
| Information sources                | 7  | Describe all information sources (e.g., databases with dates of coverage, contact with study authors to identify additional studies) in the search and date last searched.                                                                                                                                  | 3-4                |
| Search                             | 8  | Present full electronic search strategy for at least one database, including any limits used, such that it could be repeated.                                                                                                                                                                               | 3-4                |
| Study selection                    | 9  | State the process for selecting studies (i.e., screening, eligibility, included in systematic review, and, if applicable, included in the meta-analysis).                                                                                                                                                   | 4                  |
| Data collection process            | 10 | Describe method of data extraction from reports (e.g., piloted forms, independently, in duplicate) and any processes for obtaining and confirming data from investigators.                                                                                                                                  | 4                  |
| Data items                         | 11 | List and define all variables for which data were sought (e.g., PICOS, funding sources) and any assumptions and simplifications made.                                                                                                                                                                       | 4,<br>QUADAS-2     |
| Risk of bias in individual studies | 12 | Describe methods used for assessing risk of bias of individual studies (including specification of whether this was done at the study or outcome level), and how this information is to be used in any data synthesis.                                                                                      | 9,<br>QUADAS-2     |
| Summary measures                   | 13 | State the principal summary measures (e.g., risk ratio, difference in means)                                                                                                                                                                                                                                | 20                 |



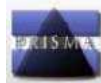

# PRISMA 2009 Checklist

|                      |    |                                                                                                                                                           |               |
|----------------------|----|-----------------------------------------------------------------------------------------------------------------------------------------------------------|---------------|
| Synthesis of results | 14 | Describe the methods of handling data and combining results of studies, if done, including measures of consistency (e.g., $I^2$ ) for each meta-analysis. | 4, 5 and Fig2 |
|----------------------|----|-----------------------------------------------------------------------------------------------------------------------------------------------------------|---------------|

Page 1 of 2

| Section/topic                 | #  | Checklist item                                                                                                                                                                                                                                                                           | Reported on page #                                    |
|-------------------------------|----|------------------------------------------------------------------------------------------------------------------------------------------------------------------------------------------------------------------------------------------------------------------------------------------|-------------------------------------------------------|
| Risk of bias across studies   | 15 | Specify any assessment of risk of bias that may affect the cumulative evidence (e.g., publication bias, selective reporting within studies).                                                                                                                                             | 9 , TABLE 2                                           |
| Additional analyses           | 16 | Describe methods of additional analyses (e.g., sensitivity or subgroup analyses, meta-regression), if done, indicating which were pre-specified.                                                                                                                                         | TABLE 3, Fig2                                         |
| <b>RESULTS</b>                |    |                                                                                                                                                                                                                                                                                          |                                                       |
| Study selection               | 17 | Give numbers of studies screened, assessed for eligibility, and included in the review, with reasons for exclusions at each stage, ideally with a flow diagram.                                                                                                                          | 4, Fig 1                                              |
| Study characteristics         | 18 | For each study, present characteristics for which data were extracted (e.g., study size, PICOS, follow-up period) and provide the citations.                                                                                                                                             | 4-5, TABLE 1                                          |
| Risk of bias within studies   | 19 | Present data on risk of bias of each study and, if available, any outcome level assessment (see item 12).                                                                                                                                                                                | 9, TABLE 2                                            |
| Results of individual studies | 20 | For all outcomes considered (benefits or harms), present, for each study: (a) simple summary data for each intervention group (b) effect estimates and confidence intervals, ideally with a forest plot.                                                                                 | TABLE 3, Fig 2                                        |
| Synthesis of results          | 21 | Present results of each meta-analysis done, including confidence intervals and measures of consistency.                                                                                                                                                                                  | 10, TABLE 3, FIG 2                                    |
| Risk of bias across studies   | 22 | Present results of any assessment of risk of bias across studies (see Item 15).                                                                                                                                                                                                          | 9, TABLE 2                                            |
| Additional analysis           | 23 | Give results of additional analyses, if done (e.g., sensitivity or subgroup analyses, meta-regression [see Item 16]).                                                                                                                                                                    | Fig 2                                                 |
| <b>DISCUSSION</b>             |    |                                                                                                                                                                                                                                                                                          |                                                       |
| Summary of evidence           | 24 | Summarize the main findings including the strength of evidence for each main outcome; consider their relevance to key groups (e.g., healthcare providers, users, and policy makers).                                                                                                     | 5-6                                                   |
| Limitations                   | 25 | Discuss limitations at study and outcome level (e.g., risk of bias), and at review-level (e.g., incomplete retrieval of identified research, reporting bias).                                                                                                                            | 5-6                                                   |
| Conclusions                   | 26 | Provide a general interpretation of the results in the context of other evidence, and implications for future research.                                                                                                                                                                  | 6                                                     |
| <b>FUNDING</b>                |    |                                                                                                                                                                                                                                                                                          |                                                       |
| Funding                       | 27 | Describe sources of funding for the systematic review and other support (e.g., supply of data); role of funders for the systematic review.<br>For peer review only - <a href="http://bmjopen.bmj.com/site/about/guidelines.xhtml">http://bmjopen.bmj.com/site/about/guidelines.xhtml</a> | Primary Health Care Research Evaluation & Development |

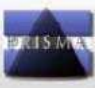

# PRISMA 2009 Checklist

1  
2  
3  
4  
5  
6  
7  
8  
9  
10  
11  
12  
13  
14  
15  
16  
17  
18  
19  
20  
21  
22  
23  
24  
25  
26  
27  
28  
29  
30  
31  
32  
33  
34  
35  
36  
37  
38  
39  
40  
41  
42  
43  
44  
45  
46  
47  
48  
49

|  |  |  |          |
|--|--|--|----------|
|  |  |  | (PHCRED) |
|--|--|--|----------|

From: Moher D, Liberati A, Tetzlaff J, Altman DG, The PRISMA Group (2009). Preferred Reporting Items for Systematic Reviews and Meta-Analyses: The PRISMA Statement. PLoS Med 6(6): e1000097. doi:10.1371/journal.pmed1000097

For more information, visit: [www.prisma-statement.org](http://www.prisma-statement.org).

Page 2 of 2

For peer review only

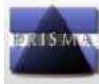

# PRISMA 2009 Checklist

| Section/topic                      | #  | Checklist item                                                                                                                                                                                                                                                                                              | Reported on page # |
|------------------------------------|----|-------------------------------------------------------------------------------------------------------------------------------------------------------------------------------------------------------------------------------------------------------------------------------------------------------------|--------------------|
| <b>TITLE</b>                       |    |                                                                                                                                                                                                                                                                                                             |                    |
| Title                              | 1  | Identify the report as a systematic review, meta-analysis, or both.                                                                                                                                                                                                                                         | 1                  |
| <b>ABSTRACT</b>                    |    |                                                                                                                                                                                                                                                                                                             |                    |
| Structured summary                 | 2  | Provide a structured summary including, as applicable: background; objectives; data sources; study eligibility criteria, participants, and interventions; study appraisal and synthesis methods; results; limitations; conclusions and implications of key findings; systematic review registration number. | 2                  |
| <b>INTRODUCTION</b>                |    |                                                                                                                                                                                                                                                                                                             |                    |
| Rationale                          | 3  | Describe the rationale for the review in the context of what is already known.                                                                                                                                                                                                                              | 3                  |
| Objectives                         | 4  | Provide an explicit statement of questions being addressed with reference to participants, interventions, comparisons, outcomes, and study design (PICOS).                                                                                                                                                  | 3                  |
| <b>METHODS</b>                     |    |                                                                                                                                                                                                                                                                                                             |                    |
| Protocol and registration          | 5  | Indicate if a review protocol exists, if and where it can be accessed (e.g., Web address), and, if available, provide registration information including registration number.                                                                                                                               | nil                |
| Eligibility criteria               | 6  | Specify study characteristics (e.g., PICOS, length of follow-up) and report characteristics (e.g., years considered, language, publication status) used as criteria for eligibility, giving rationale.                                                                                                      | 3                  |
| Information sources                | 7  | Describe all information sources (e.g., databases with dates of coverage, contact with study authors to identify additional studies) in the search and date last searched.                                                                                                                                  | 3-4                |
| Search                             | 8  | Present full electronic search strategy for at least one database, including any limits used, such that it could be repeated.                                                                                                                                                                               | 3-4                |
| Study selection                    | 9  | State the process for selecting studies (i.e., screening, eligibility, included in systematic review, and, if applicable, included in the meta-analysis).                                                                                                                                                   | 4                  |
| Data collection process            | 10 | Describe method of data extraction from reports (e.g., piloted forms, independently, in duplicate) and any processes for obtaining and confirming data from investigators.                                                                                                                                  | 4                  |
| Data items                         | 11 | List and define all variables for which data were sought (e.g., PICOS, funding sources) and any assumptions and simplifications made.                                                                                                                                                                       | 4,<br>QUADAS-2     |
| Risk of bias in individual studies | 12 | Describe methods used for assessing risk of bias of individual studies (including specification of whether this was done at the study or outcome level), and how this information is to be used in any data synthesis.                                                                                      | 9,<br>QUADAS-2     |
| Summary measures                   | 13 | State the principal summary measures (e.g., risk ratio, difference in means).                                                                                                                                                                                                                               | 20                 |
| Synthesis of results               | 14 | Describe the methods of handling data and combining results of studies, if done, including measures of consistency (e.g., $I^2$ ) for each meta-analysis.                                                                                                                                                   | 4, 5 and<br>Fig2   |

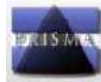

# PRISMA 2009 Checklist

| Section/topic                 | #  | Checklist item                                                                                                                                                                                           | Reported on page #                                             |
|-------------------------------|----|----------------------------------------------------------------------------------------------------------------------------------------------------------------------------------------------------------|----------------------------------------------------------------|
| Risk of bias across studies   | 15 | Specify any assessment of risk of bias that may affect the cumulative evidence (e.g., publication bias, selective reporting within studies).                                                             | 9, TABLE 2                                                     |
| Additional analyses           | 16 | Describe methods of additional analyses (e.g., sensitivity or subgroup analyses, meta-regression), if done, indicating which were pre-specified.                                                         | TABLE 3, Fig 2                                                 |
| <b>RESULTS</b>                |    |                                                                                                                                                                                                          |                                                                |
| Study selection               | 17 | Give numbers of studies screened, assessed for eligibility, and included in the review, with reasons for exclusions at each stage, ideally with a flow diagram.                                          | 4, Fig 1                                                       |
| Study characteristics         | 18 | For each study, present characteristics for which data were extracted (e.g., study size, PICOS, follow-up period) and provide the citations.                                                             | 4-5, TABLE 1                                                   |
| Risk of bias within studies   | 19 | Present data on risk of bias of each study and, if available, any outcome level assessment (see item 12).                                                                                                | 9, TABLE 2                                                     |
| Results of individual studies | 20 | For all outcomes considered (benefits or harms), present, for each study: (a) simple summary data for each intervention group (b) effect estimates and confidence intervals, ideally with a forest plot. | TABLE 3, Fig 2                                                 |
| Synthesis of results          | 21 | Present results of each meta-analysis done, including confidence intervals and measures of consistency.                                                                                                  | 10, TABLE 3, FIG 2                                             |
| Risk of bias across studies   | 22 | Present results of any assessment of risk of bias across studies (see Item 15).                                                                                                                          | 9, TABLE 2                                                     |
| Additional analysis           | 23 | Give results of additional analyses, if done (e.g., sensitivity or subgroup analyses, meta-regression [see Item 16]).                                                                                    | Fig 2                                                          |
| <b>DISCUSSION</b>             |    |                                                                                                                                                                                                          |                                                                |
| Summary of evidence           | 24 | Summarize the main findings including the strength of evidence for each main outcome; consider their relevance to key groups (e.g., healthcare providers, users, and policy makers).                     | 5-6                                                            |
| Limitations                   | 25 | Discuss limitations at study and outcome level (e.g., risk of bias), and at review-level (e.g., incomplete retrieval of identified research, reporting bias).                                            | 5-6                                                            |
| Conclusions                   | 26 | Provide a general interpretation of the results in the context of other evidence, and implications for future research.                                                                                  | 6                                                              |
| <b>FUNDING</b>                |    |                                                                                                                                                                                                          |                                                                |
| Funding                       | 27 | Describe sources of funding for the systematic review and other support (e.g., supply of data); role of funders for the systematic review.                                                               | Primary Health Care Research Evaluation & Development (PHCRED) |

# BMJ Open

## Is there sufficient evidence for tuning fork tests in diagnosing fractures? A systematic review

|                                 |                                                                                                                                                                                                                                                                                                                                                                                                                                                   |
|---------------------------------|---------------------------------------------------------------------------------------------------------------------------------------------------------------------------------------------------------------------------------------------------------------------------------------------------------------------------------------------------------------------------------------------------------------------------------------------------|
| Journal:                        | <i>BMJ Open</i>                                                                                                                                                                                                                                                                                                                                                                                                                                   |
| Manuscript ID:                  | bmjopen-2014-005238.R1                                                                                                                                                                                                                                                                                                                                                                                                                            |
| Article Type:                   | Research                                                                                                                                                                                                                                                                                                                                                                                                                                          |
| Date Submitted by the Author:   | 11-Jul-2014                                                                                                                                                                                                                                                                                                                                                                                                                                       |
| Complete List of Authors:       | Mugunthan, Kayalvili; Center for Research in Evidence Based Practice, Faculty of Health Sciences and Medicine, Bond University<br>Doust, Jenny; Center for Research in Evidence Based Practice, Faculty of Health Sciences and Medicine, Bond University<br>Center for Kurz, Bodo; CAU zu Kiel, Anatomisches Institut<br>Glasziou, Paul; Center for Research in Evidence Based Practice, Faculty of Health Sciences and Medicine, Bond University |
| <b>Primary Subject Heading</b>: | Evidence based practice                                                                                                                                                                                                                                                                                                                                                                                                                           |
| Secondary Subject Heading:      | Qualitative research                                                                                                                                                                                                                                                                                                                                                                                                                              |
| Keywords:                       | Epidemiology < ONCOLOGY, Orthopaedic sports trauma < ORTHOPAEDIC & TRAUMA SURGERY, QUALITATIVE RESEARCH                                                                                                                                                                                                                                                                                                                                           |
|                                 |                                                                                                                                                                                                                                                                                                                                                                                                                                                   |

SCHOLARONE™  
Manuscripts

**Title Page****1. Title of the article**

Is there sufficient evidence for tuning fork tests in diagnosing fractures?

A systematic review

**2. Corresponding author** Kayalvili Mugunthan

14,University Drive, Robina, QLD 4229 , Australia.

[kmugunth@bond.edu.au](mailto:kmugunth@bond.edu.au), + 61755955521

**3. Co- authors****a)Jenny Doust**

Professor of Public Health, Centre for Research in Evidence Based Practice  
Faculty of Health Sciences & Medicine, Bond University, Robina, QLD 4229 ,  
Australia

**b)Prof. Dr. BodoKurz**

AnatomischesInstitut ,  
CAU zu Kiel,  
Olshausenstrasse 40-60  
24098 Kiel

**c) Paul Glasziou**

Director,Centre for Research in Evidence Based Practice,  
Faculty of Health Sciences & Medicine, Bond University, Robina, QLD 4229 ,  
Australia

**Key words**

Tuning fork, bone fractures, diagnostic procedures and techniques, diagnosis, sensitivity  
specificity

**Word count**

1322

## Abstract

### Objective

To determine the diagnostic accuracy of tuning fork tests for detecting fractures

### Design

Systematic review of primary studies evaluating the diagnostic accuracy of tuning fork tests for the presence of fracture.

### Data source

We searched Medline, CINAHL, AMED, EMBASE, Sports Discus, CAB Abstracts and Web of Science from commencement to November 2012. We manually searched the reference lists of any review papers and any identified relevant studies.

### Study selection and data extraction

Two reviewers independently reviewed the list of potentially eligible studies and rated the studies for quality using the QUADAS 2 tool. Data was extracted to form 2x2 contingency tables. The primary outcome measure was the accuracy of the test as measured by its sensitivity and specificity with 95% confidence intervals.

### Data synthesis

We included 6 studies (329 patients), with 2 types of tuning fork tests (pain induction, loss of sound transmission). The studies included patients with an age range of 7 to 60. The prevalence of fracture ranged from 10% to 80%. The sensitivity of the tuning fork tests was high, ranging from 75% to 100%. The specificity of the tests was highly heterogeneous, ranging from 18% to 95%.

### Conclusion

Based on the studies in this review, tuning fork tests have some value in ruling out fractures, but are not sufficiently reliable or accurate for widespread clinical use. The small sample sizes of the studies and the observed heterogeneity make generalizable conclusion difficult.

### Strength and limitations of the study

- Based on the studies in this review, tuning fork tests have value in ruling out some fractures, but current evidence is insufficient to state the circumstances when it is reliable
- Quantification of the degree and causes of heterogeneity of the studies was not feasible, because of small sample sizes and varying methods of the studies

Therefore this review does not support the current clinical use of tuning forks as a triage test for the diagnosis of fractures.

## Is there sufficient evidence for tuning fork test in diagnosing fractures?

### A systematic review

#### Introduction

Although imaging for suspected fractures is generally cheap and readily accessible, there are situations such as remote settings, where imaging is not readily available. Other clinical tests for fracture may then assist in decision making. One test which was proposed at least 60 years ago is the use of a tuning fork.[1]

Two methods of using tuning forks to detect fractures have been developed. The first method uses a vibrating tuning fork placed directly over, or closely proximal to the suspected fracture site. Because the periosteum is heavily innervated, mechanical vibration over a fracture site stimulates the overlying periosteum, causing pain.[2] The pain stops or decreases with the removal of the tuning fork. The second method uses a vibrating tuning fork placed over a bony prominence distal to the fracture site. Using a stethoscope to listen to the sound over a bony prominence proximal to the fracture site, the fracture is detected by a reduction in the sound conducted along the bone compared to the unaffected limb.[1]

The aim of this review was to identify the techniques used to diagnose fractures using a tuning fork and assess all studies of the diagnostic accuracy of tuning fork tests for the presence of fracture.

#### Methods

The inclusion criteria for the review were primary studies that assessed the diagnostic accuracy of tuning forks, using either pain or reduction of sound as the index test, measured against a recognised reference standard, such as X-ray, MRI or bone scan for the diagnosis of fractures. We included studies that enrolled patients of all ages and in all clinical settings with no exclusion by language of publication. We excluded case series, case-control studies, and narrative review papers.



## Search Strategy

We searched Medline, CINAHL, AMED, EMBASE, Sports Discus, CAB Abstracts and Web of Science from commencement to November 2012. We also searched the reference lists of any identified studies or review papers. We also searched for any systematic reviews or meta-analyses done on this diagnostic test.

The Medline search strategy is shown in Box 1, and was run without a methodological filter.

## Data extraction and management

We selected studies in a two stage process. The titles and abstracts of all search results were screened by two authors (KM, JD) and full manuscripts for all potential relevant papers were obtained. Two review authors (KM, JD) independently reviewed each paper for inclusion according to the predefined inclusion criteria, then rated study quality and extracted relevant data. In the case of duplicate publication, we selected the most complete version of the study. We resolved disagreements through discussion with a third author (PG).

The primary outcome measure of interest was the accuracy of the test as measured by its sensitivity and specificity. Wherever possible, we used the raw data to construct 2x2 tables. 95% confidence intervals for sensitivity and specificity were calculated with the Wilson score method and 95% confidence intervals for positive and negative likelihood ratios were calculated with the method described by Simel et al (1991). [3,4] We appraised each article using the QUADAS 2 tool. [5]

## Results

### Literature identification and study quality

We identified 62 citations from the electronic and bibliographic searches. 16 articles in full text were obtained for further scrutiny. Six primary studies (329 patients) were included in the final review (Figure 1).

The characteristics of the participants and the methods of testing are shown in Table 1. Most studies included only adults; one study included paediatric patients. The prevalence of fracture ranged from 10% to 80%. Two studies used the tuning fork test to investigate any suspected fracture, [2,6] one suspected femoral neck fractures, [7] one ankle inversion injuries, [8] and two stress fractures. [9,10] The studies investigating any fracture, femoral or ankle fractures used X-ray as a reference standard and the studies of stress fractures used either bone scan or X-ray and bone scan as a reference standard. The study of patients with ankle inversion injuries included patients who had tested positive to the "Ottawa ankle rule".

1  
2  
3  
4  
5  
6 Four studies detected fractures by using pain induced by the vibrating tuning fork,[2,8,9,10]while  
7 two studies used reduced sound conduction .[7,6] Four studies used a 128Hz tuning fork  
8 alone,[6,7,8,9] but two studies compared the diagnostic accuracy of different frequency tuning  
9 forks within the studies.[2,10]  
10

11  
12  
13  
14 The methodological quality of the included studies was modest, with important elements that  
15 may indicate a risk of bias being unclear or not reported. For example, in most studies it was  
16 either unclear or not stated whether the comparison between the tuning fork test and reference  
17 test had been blind and independent of the reference standard (Table 2).  
18  
19

20  
21  
22 Figure 2 shows sensitivity versus 1- specificity (ROC plot) for the 6 included studies. The  
23 sensitivity of the tuning fork tests was generally high, ranging from 75% to 100%. In the study to  
24 rule out fracture in patients who had tested positive to the “Ottawa ankle rule”, the use of the  
25 tuning fork on either the tip of the lateral malleolus or the distal fibula shaft gave a sensitivity of  
26 100%, albeit there were only 5 patients with fractures,[1].However the specificity of the test in  
27 the six studies was highly heterogeneous, ranging from 18% to 95%.  
28  
29  
30

31  
32  
33  
34 Two studies showed reasonable overall diagnostic accuracy with diagnostic odds ratios > 10,but  
35 other studies showed only modest values (Table 3). The two studies that compared the diagnostic  
36 accuracy of different frequency tuning forks on the same patients found no differences between  
37 frequencies.[2,10]One study assessed the differences between pain ratings but differences were  
38 small. The one study that assessed inter-tester reliability showed only low reliability.[9]  
39  
40  
41

## 42 43 44 **Discussion**

45 Two forms of tuning fork test, one based on pain induction and one on sound transmission,  
46 showed modest diagnostic accuracy with some ability to rule out fractures. However, the  
47 estimated sensitivity (ranging from 75% to 100%) is not sufficient to be relied upon to rule out  
48 fractures based on a negative test. The specificity is particularly heterogeneous, potentially  
49 resulting in a high proportion of false positive test results. The reasons for this variation in  
50 accuracy are unclear, but may be related to both the way the test is done or to characteristics of  
51 the injuries and fractures.  
52  
53  
54

55 The low inter-tester reliability suggests that the techniques would benefit from standardization  
56 and training. Wilder et al,[10]compared different frequencies and found a higher induction of  
57  
58  
59  
60

1  
2  
3 fracture pain using 256Hz, but pain also occurred in patients without fractures resulting in a low  
4 specificity.  
5  
6

7  
8 Based on the results in this review, the tuning fork test was less accurate for stress fractures than  
9 other types of fractures, but a number of features of this type of injury may modify the accuracy.  
10 Lesho[9] suggests that in the early stages, stress fractures might not be identified by the tuning  
11 fork test, because the bone shell is still more or less intact. A bone scan, however, would show an  
12 increased activity in the fractured area. Timing may also affect the accuracy of the test.  
13  
14

15 A mineralized callus where fracture healing has been initiated might not be identified by these  
16 tests. It is unclear whether a discontinuity of the cortical bone is required in order to give a  
17 positive test result. Both types of tuning fork tests seem to be more accurate in diagnosing  
18 transverse fractures than other types of fractures. It also unclear whether swelling or bruising in  
19 the area of the injury might affect the results.  
20  
21

22 A systematic review,[11] which examined a variety of methods for the diagnosis of stress  
23 fractures included only 2 of the 6 studies we used in this review.  
24  
25

26 In conclusion, both tuning fork methods have some discrimination ability, but current techniques  
27 are not sufficient reliable or accurate to rule in or out fractures and currently should have only  
28 limited use in clinical practice. The small sample sizes of the studies and the observed  
29 heterogeneity make generalizable conclusion difficult. But the clinical usefulness of these tests  
30 might be in remote areas or athletic fields with no easy access to other options.  
31  
32  
33

### 34 **Acknowledgements**

35 We extend our gratitude to Sarah Thorning (Trial search coordinator, Bond University) for  
36 valuable help in literature search and Elaine Beller (Statistician, Bond University) for statistical  
37 support.  
38  
39  
40

### 41 **Contributorship Statement**

42 KM,JD,BK,PG contributed to the concepts of the work and acquisition, analysis and  
43 interpretation of data. KM drafted the work. JD,BK,PG revised the work critically for important  
44 intellectual content. All authors approved the final version.  
45  
46  
47

### 48 **Competing interest**

49 The authors have declared no competing interest  
50  
51

52 **Funding** Kayalvili Mugunthan is supported by a Primary Health Care Research Evaluation &  
53 Development (PHCRED) fellowship, Bond University  
54  
55

56 **Data Sharing** No additional data available  
57  
58  
59  
60

**References:**

- 1 Weisberg JL. Evaluation of bone continuity by sound conduction. *Bulletin of the United States Army Medical Department*.1945;4:471-4
- 2 Kazemi M, Roscoe MW. Is the tuning fork test a reliable tool in detecting acute simple fractures?*Internaional Sports Journal*.2000 Summer;4(2):1-8.
- 3 <http://www.stats.org.uk/statistical-inference/Newcombe1998.pdf> Accessed on 5th July 2014
- 4 Simel DL, Samsa GP, Matchar DB. Likelihood ratios with confidence: sample size estimation for diagnostic test studies. *Journal of Clinical Epidemiology*.1991;44:763-70.
- 5 Whiting P, Rutjesw AW, Westwood M, et al.Updating QUADAS: evidence to inform the development of QUADAS-2. 2010.Accessed at [www.bris.ac.uk/quadas/resources/quadas2reportv4.pdf](http://www.bris.ac.uk/quadas/resources/quadas2reportv4.pdf) on 5 July 2014.
- 6 Moore MB. The use of a tuning fork and stethoscope to identify fractures.*Journal of Athletic Training*. 2009;44(3):272-4.
- 7 Bache JB, Cross AB. The Barford test. A useful diagnostic sign in fractures of the femoral neck. *Practitioner*.1984;228(1389):305-8.
- 8 Dissmann PD, Han KH. The tuning fork test: a useful tool for improving specificity in “Ottawa positive” patients after ankle inversion injury. *Emerg Med J*. 2006;23(10):788– 90.
- 9 Lesho EP. Can tuning forks replace bone scans for identification of tibial stress fractures? *Mil Med*.1997;162(12):802-3.
- 10 Wilder RP, Vincent HK, Stewart J et al. Clinical Use of Tuning Forks to Identify Running-Related Stress Fractures. *Athletic Training & Sports Health Care: The Journal for the Practicing Clinician*. 2009;1(1):12-8.
- 11.Schneiders AG, Sullivan SJ, Hendrick PA et al. The ability of clinical tests to diagnose stress fractures: a systematic review and meta-analysis. *J Orthop Sports Phys Ther*. 2012;42(9):760-71.

**Box 1:**

Ovid MEDLINE (<1948 to November Week 3 2012>)

Search Strategy:

- 1 tuning fork\*.tw. (302)
- 2 barford test\*.tw. (1)
- 3 tf test\*.tw. (79)
- 4 auscultation\*.tw. (2953)
- 5 or/1-4 (3334)
- 6 exp Fractures, Bone/ (133424 )
- 7 fracture\*.tw. (149937)
- 8 or/6-7 (187939)
- 9 5 and 8 (20)

**Table 1: Characteristics of the included studies**

|                          | <b>Bache<sup>7</sup><br/>(1984)</b> | <b>Moore<sup>6</sup><br/>(2009)</b>         | <b>Lesho<sup>9</sup><br/>(1997)</b> | <b>Kazemi<sup>2</sup><br/>(2000)</b> | <b>Dissmann<sup>8</sup><br/>(2006)</b> | <b>Wilder<sup>10</sup><br/>(2008)</b> |
|--------------------------|-------------------------------------|---------------------------------------------|-------------------------------------|--------------------------------------|----------------------------------------|---------------------------------------|
| <b>Index test</b>        | <b>Sound conduction</b>             |                                             | <b>Pain from vibration</b>          |                                      |                                        |                                       |
| Number of participants   | 100                                 | 37                                          | 52                                  | 46                                   | 49                                     | 45                                    |
| Age( years)              | Mean<br>79                          | Range<br>7-60                               | Mean<br>25                          | Mean<br>30                           | Range<br>12-84                         | Mean<br>31                            |
| Setting                  | Emergency department                | University sports clinic/ orthopedic center | Army medical center                 | Emergency department                 | Emergency department                   | Runners clinic                        |
| Suspected fracture type  | Femoral neck fracture               | Any fracture                                | Tibial stress fracture              | Any fracture                         | Ankle inversion injuries*              | Stress fractures in leg and feet      |
| <b>Reference test</b>    | X-ray                               | X-ray                                       | Bone scan                           | Bone scan                            | X-ray                                  | X-ray and bone scan                   |
| Time since symptom onset | Not reported                        | < 7 days old                                | Not reported                        | 0-10 days                            | Not reported                           | Not reported                          |

\* Patients had tested positive to the 'Ottawa ankle rule'

**Table 2: Methodological quality of the included studies**

| Criterion                                                                                      | Bache <sup>7</sup><br>(1984) | Moore <sup>6</sup><br>(2009) | Lesho <sup>9</sup><br>(1997) | Kazemi <sup>8</sup><br>(2000) | Dissmann <sup>2</sup><br>(2006) | Wilder <sup>10</sup><br>(2008) |
|------------------------------------------------------------------------------------------------|------------------------------|------------------------------|------------------------------|-------------------------------|---------------------------------|--------------------------------|
| Consecutive or random sample                                                                   | Yes                          | Yes                          | Yes                          | Yes                           | Yes                             | Yes                            |
| Case-control study design avoided                                                              | Yes                          | Yes                          | Yes                          | Yes                           | Yes                             | Yes                            |
| Inappropriate exclusions avoided                                                               | Yes                          | Yes                          | Yes                          | Yes                           | Yes                             | Yes                            |
| Index test interpreted blind and independent of reference standard/<br>Pre-specified threshold | Unclear                      | Yes                          | Yes                          | Yes                           | Yes                             | Unclear                        |
| Appropriate reference standard                                                                 | Yes                          | Yes                          | Yes                          | Yes                           | Yes                             | Yes                            |
| Reference standard interpreted blind and independent of index test                             | Unclear                      | Unclear                      | Unclear                      | Yes                           | Yes                             | Unclear                        |
| Appropriate interval between index test and reference standard                                 | Not reported                 | Not reported                 | Within 30 days               | Not reported                  | Not reported                    | Not reported                   |
| All patients received a reference standard/<br>same reference standard                         | Yes                          | Yes                          | No                           | Yes                           | Yes                             | No                             |
| All patients included in the analysis                                                          | Yes                          | Yes                          | No                           | Yes                           | Yes                             | No                             |

1  
2  
3  
4  
5  
6  
7  
8  
9  
10  
11  
12  
13  
14  
15  
16  
17  
18  
19  
20  
21  
22  
23  
24  
25  
26  
27  
28  
29  
30  
31  
32  
33  
34  
35  
36  
37  
38  
39  
40  
41  
42  
43  
44  
45  
46  
47  
48  
49

**Table 3: Overview of the results of the included studies**

| <b>Results of testing</b>           | <b>Bache<sup>7</sup><br/>(1984)</b> | <b>Moore<sup>6</sup><br/>(2009)</b> | <b>Lesho<sup>9</sup><br/>(1997)</b> | <b>Kazemi<sup>2</sup><br/>(2000)</b> |                     | <b>Dissmann<sup>8</sup><br/>(2006)</b> |                     | <b>Wilder<sup>10</sup><br/>(2008)</b> |                    |                     |
|-------------------------------------|-------------------------------------|-------------------------------------|-------------------------------------|--------------------------------------|---------------------|----------------------------------------|---------------------|---------------------------------------|--------------------|---------------------|
| Type of tuning fork                 | 128Hz                               | 128Hz                               | 128Hz                               | 128Hz                                | 256Hz               | 128Hz<br>TLM                           | 128Hz<br>DFS        | 128Hz                                 | 256Hz              | 512Hz               |
| Prevalence of fractures             | 56%                                 | 32%                                 | 61%                                 | 80%                                  | 80%                 | 10%                                    | 10%                 | 27%                                   | 27%                | 27%                 |
| Sensitivity (% , 95% CI)            | 91<br>(81-96)                       | 83<br>(55-95)                       | 75<br>(57-87)                       | 89<br>(75-96)                        | 89<br>(75-96)       | 92<br>(52-99)                          | 92<br>(52-99)       | 83<br>(55-95)                         | 92<br>(67-99)      | 77<br>(49-92)       |
| Specificity (% , 95% CI)            | 18<br>(9-32)                        | 80<br>(61-91)                       | 67<br>(44-84)                       | 44<br>(19-73)                        | 44<br>(19-73)       | 61<br>(46-74)                          | 94<br>(84-98)       | 37<br>(23-55)                         | 19<br>(9-36)       | 64<br>(47-79)       |
| Diagnostic Odd ratio                | 2.3<br>(0.7-7.5)                    | 20.0<br>(3.3-122)                   | 6.0<br>(1.6-22)                     | 6.6<br>(1.2-35.2)                    | 6.6<br>(1.2-35.2)   | 17.3<br>(0.9-332)                      | 187.0<br>(7.9-4424) | 3.0<br>(0.6-16.1)                     | 2.9<br>(0.3-26.7)  | 6.1<br>(1.4-26.7)   |
| Positivelike lihood ratio: (95% CI) | 1.1<br>(0.94-1.3)                   | 4.2<br>(1.8-9.5)                    | 2.2<br>(1.1-4.5)                    | 1.6<br>(0.89-2.9)                    | 1.6<br>(0.89-2.91)  | 2.4<br>(1.5-3.7)                       | 16.5<br>(4.8-56)    | 1.3<br>(0.92-1.9)                     | 1.1<br>(0.91-1.4)  | 2.2<br>(1.2-3.8)    |
| Negativelik elihood ratio: (95% CI) | 0.49<br>(0.17-1.4)                  | 0.21<br>(0.06-0.75)                 | 0.37<br>(0.18-0.77)                 | 0.24<br>(0.08-0.79)                  | 0.24<br>(0.08-0.79) | 0.14<br>(0.01-2.0)                     | 0.09<br>(0.01-1.3)  | 0.45<br>(0.12-1.7)                    | 0.39<br>(0.05-3.0) | 0.36<br>(0.13-0.99) |

TLM- tip of lateral malleolus ; DFS- distal fibula shaft



## Figures and Tables

Figure 1: Flow chart of studies included in the review.

Figure 2: Sensitivity versus 1-specificity (ROC) plot of included studies.

Table 1: Characteristics of the included studies

Table 2: Methodological quality of the included studies

Table 3: Overview of the results of the included studies

## Title Page

### 1. Title of the article

Is there sufficient evidence for tuning fork tests in diagnosing fractures?

A systematic review

### 2. Corresponding author **KayalviliMugunthan**

14,University Drive, Robina, QLD 4229 , Australia.

[kmugunth@bond.edu.au](mailto:kmugunth@bond.edu.au), + 61755955521

### 3. Co- authors

#### a)Jenny Doust

Professor of Public Health, Centre for Research in Evidence Based Practice  
Faculty of Health Sciences & Medicine, Bond University, Robina, QLD 4229 ,  
Australia

#### b)Prof. Dr. BodoKurz

AnatomischesInstitut ,  
CAU zu Kiel,  
Olshausenstrasse 40-60  
24098 Kiel

#### c) Paul Glasziou

Director,Centre for Research in Evidence Based Practice,  
Faculty of Health Sciences & Medicine, Bond University, Robina, QLD 4229 ,  
Australia

### Key words

Tuning fork, bone fractures, diagnostic procedures and techniques, diagnosis, sensitivity  
specificity

### Word count

1322

## Abstract

### Objective

To determine the diagnostic accuracy of tuning fork tests for detecting fractures

### Design

Systematic review of primary studies evaluating the diagnostic accuracy of tuning fork tests for the presence of fracture.

### Data source

We searched Medline, CINAHL, AMED, EMBASE, Sports Discus, CAB Abstracts and Web of Science from commencement to November 2012. We manually searched the reference lists of any review papers and any identified relevant studies.

### Study selection and data extraction

Two reviewers independently reviewed the list of potentially eligible studies and rated the studies for quality using the QUADAS 2 tool. Data was extracted to form 2x2 contingency tables. The primary outcome measure was the accuracy of the test as measured by its sensitivity and specificity with 95% confidence intervals.

### Data synthesis

We included 6 studies (329 patients), with 2 types of tuning fork tests (pain induction, loss of sound transmission). The studies included patients with an age range of 7 to 60. The prevalence of fracture ranged from 10% to 80%. The sensitivity of the tuning fork tests was high, ranging from 75% to 100%. The specificity of the tests was highly heterogeneous, ranging from 18% to 95%.

### Conclusion

Based on the studies in this review, tuning fork tests have some value in ruling out fractures, but are not sufficiently reliable or accurate for widespread clinical use. The small sample sizes of the studies and the observed heterogeneity make generalizable conclusion difficult.

### Strength and limitations of the study

- Based on the studies in this review, tuning fork tests have value in ruling out some fractures, but current evidence is insufficient to state the circumstances when it is reliable
- Quantification of the degree and causes of heterogeneity of the studies was not feasible, because of small sample sizes and varying methods of the studies

Therefore this review does not support the current clinical use of tuning forks as a triage test for the diagnosis of fractures.

## Is there sufficient evidence for tuning fork test in diagnosing fractures?

### A systematic review

#### Introduction

Although imaging for suspected fractures is generally cheap and readily accessible, there are situations such as remote settings, where imaging is not readily available. Other clinical tests for fracture may then assist in decision making. One test which was proposed at least 60 years ago is the use of a tuning fork.[1]

Two methods of using tuning forks to detect fractures have been developed. The first method uses a vibrating tuning fork placed directly over, or closely proximal to the suspected fracture site. Because the periosteum is heavily innervated, mechanical vibration over a fracture site stimulates the overlying periosteum, causing pain.[2] The pain stops or decreases with the removal of the tuning fork. The second method uses a vibrating tuning fork placed over a bony prominence distal to the fracture site. Using a stethoscope to listen to the sound over a bony prominence proximal to the fracture site, the fracture is detected by a reduction in the sound conducted along the bone compared to the unaffected limb.[1]

The aim of this review was to identify the techniques used to diagnose fractures using a tuning fork and assess all studies of the diagnostic accuracy of tuning fork tests for the presence of fracture.

#### Methods

The inclusion criteria for the review were primary studies that assessed the diagnostic accuracy of tuning forks, using either pain or reduction of sound as the index test, measured against a recognised reference standard, such as X-ray, MRI or bone scan for the diagnosis of fractures. We included studies that enrolled patients of all ages and in all clinical settings with no exclusion by language of publication. We excluded case series, case-control studies, and narrative review papers.

## Search Strategy

We searched Medline, CINAHL, AMED, EMBASE, Sports Discus, CAB Abstracts and Web of Science from commencement to November 2012. We also searched the reference lists of any identified studies or review papers. We also searched for any systematic reviews or meta-analyses done on this diagnostic test.

The Medline search strategy is shown in Box 1, and was run without a methodological filter.

## Data extraction and management

We selected studies in a two stage process. The titles and abstracts of all search results were screened by two authors (KM, JD) and full manuscripts for all potential relevant papers were obtained. Two review authors (KM, JD) independently reviewed each paper for inclusion according to the predefined inclusion criteria, then rated study quality and extracted relevant data. In the case of duplicate publication, we selected the most complete version of the study. We resolved disagreements through discussion with a third author (PG).

The primary outcome measure of interest was the accuracy of the test as measured by its sensitivity and specificity. Wherever possible, we used the raw data to construct 2x2 tables. 95% confidence intervals for sensitivity and specificity were calculated with the Wilson score method and 95% confidence intervals for positive and negative likelihood ratios were calculated with the method described by Simel et al (1991). [3,4] We appraised each article using the QUADAS 2 tool. [5]

## Results

### Literature identification and study quality

We identified 62 citations from the electronic and bibliographic searches. 16 articles in full text were obtained for further scrutiny. Six primary studies (329 patients) were included in the final review (Figure 1).

The characteristics of the participants and the methods of testing are shown in Table 1. Most studies included only adults; one study included paediatric patients. The prevalence of fracture ranged from 10% to 80%. Two studies used the tuning fork test to investigate any suspected fracture, [2,6] one suspected femoral neck fractures, [7] one ankle inversion injuries, [8] and two stress fractures. [9,10] The studies investigating any fracture, femoral or ankle fractures used X-ray as a reference standard and the studies of stress fractures used either bone scan or X-ray and bone scan as a reference standard. The study of patients with ankle inversion injuries included patients who had tested positive to the "Ottawa ankle rule".

1  
2  
3  
4  
5  
6 Four studies detected fractures by using pain induced by the vibrating tuning fork,[2,8,9,10]while  
7 two studies used reduced sound conduction .[7,6] Four studies used a 128Hz tuning fork  
8 alone,[6,7,8,9] but two studies compared the diagnostic accuracy of different frequency tuning  
9 forks within the studies.[2,10]  
10

11  
12  
13  
14 The methodological quality of the included studies was modest, with important elements that  
15 may indicate a risk of bias being unclear or not reported. For example, in most studies it was  
16 either unclear or not stated whether the comparison between the tuning fork test and reference  
17 test had been blind and independent of the reference standard (Table 2).  
18  
19

20  
21  
22 Figure 2 shows sensitivity versus 1- specificity (ROC plot) for the 6 included studies. The  
23 sensitivity of the tuning fork tests was generally high, ranging from 75% to 100%. In the study to  
24 rule out fracture in patients who had tested positive to the “Ottawa ankle rule”, the use of the  
25 tuning fork on either the tip of the lateral malleolus or the distal fibula shaft gave a sensitivity of  
26 100%, albeit there were only 5 patients with fractures,[1].However the specificity of the test in  
27 the six studies was highly heterogeneous, ranging from 18% to 95%.  
28  
29  
30

31  
32  
33  
34 Two studies showed reasonable overall diagnostic accuracy with diagnostic odds ratios > 10,but  
35 other studies showed only modest values (Table 3). The two studies that compared the diagnostic  
36 accuracy of different frequency tuning forks on the same patients found no differences between  
37 frequencies.[2,10]One study assessed the differences between pain ratings but differences were  
38 small. The one study that assessed inter-tester reliability showed only low reliability.[9]  
39  
40  
41

#### 42 43 44 **Discussion**

45 Two forms of tuning fork test, one based on pain induction and one on sound transmission,  
46 showed modest diagnostic accuracy with some ability to rule out fractures. However, the  
47 estimated sensitivity (ranging from 75% to 100%) is not sufficient to be relied upon to rule out  
48 fractures based on a negative test. The specificity is particularly heterogeneous, potentially  
49 resulting in a high proportion of false positive test results. The reasons for this variation in  
50 accuracy are unclear, but may be related to both the way the test is done or to characteristics of  
51 the injuries and fractures.  
52  
53  
54

55 The low inter-tester reliability suggests that the techniques would benefit from standardization  
56 and training. Wilder et al,[10]compared different frequencies and found a higher induction of  
57  
58  
59  
60

fracture pain using 256Hz, but pain also occurred in patients without fractures resulting in a low specificity.

Based on the results in this review, the tuning fork test was less accurate for stress fractures than other types of fractures, but a number of features of this type of injury may modify the accuracy. Lesho[9] suggests that in the early stages, stress fractures might not be identified by the tuning fork test, because the bone shell is still more or less intact. A bone scan, however, would show an increased activity in the fractured area. Timing may also affect the accuracy of the test.

A mineralized callus where fracture healing has been initiated might not be identified by these tests. It is unclear whether a discontinuity of the cortical bone is required in order to give a positive test result. Both types of tuning fork tests seem to be more accurate in diagnosing transverse fractures than other types of fractures. It also unclear whether swelling or bruising in the area of the injury might affect the results.

A systematic review,[11] which examined a variety of methods for the diagnosis of stress fractures included only 2 of the 6 studies we used in this review.

In conclusion, both tuning fork methods have some discrimination ability, but current techniques are not sufficient reliable or accurate to rule in or out fractures and currently should have only limited use in clinical practice. The small sample sizes of the studies and the observed heterogeneity make generalizable conclusion difficult. But the clinical usefulness of these tests might be in remote areas or or athletic fields with no easy access to other options.

**Box 1:**

Ovid MEDLINE (<1948 to November Week 3 2012>)

Search Strategy:

- 1 tuning fork\*.tw. (302)
- 2 barford test\*.tw. (1)
- 3 tf test\*.tw. (79)
- 4 auscultation\*.tw. (2953)
- 5 or/1-4 (3334)
- 6 exp Fractures, Bone/ (133424 )
- 7 fracture\*.tw. (149937)
- 8 or/6-7 (187939)
- 9 5 and 8 (20)

1  
2  
3  
4  
5  
6  
7  
8  
9  
10  
11  
12  
13  
14  
15  
16  
17  
18  
19  
20  
21  
22  
23  
24  
25  
26  
27  
28  
29  
30  
31  
32  
33  
34  
35  
36  
37  
38  
39  
40  
41  
42  
43  
44  
45  
46  
47  
48  
49

**Table 1: Characteristics of the included studies**

|                          | <b>Bache<sup>7</sup><br/>(1984)</b> | <b>Moore<sup>6</sup><br/>(2009)</b>         | <b>Lesho<sup>9</sup><br/>(1997)</b> | <b>Kazemi<sup>2</sup><br/>(2000)</b> | <b>Dissmann<sup>8</sup><br/>(2006)</b> | <b>Wilder<sup>10</sup><br/>(2008)</b> |
|--------------------------|-------------------------------------|---------------------------------------------|-------------------------------------|--------------------------------------|----------------------------------------|---------------------------------------|
| <b>Index test</b>        | <b>Sound conduction</b>             |                                             | <b>Pain from vibration</b>          |                                      |                                        |                                       |
| Number of participants   | 100                                 | 37                                          | 52                                  | 46                                   | 49                                     | 45                                    |
| Age( years)              | Mean<br>79                          | Range<br>7-60                               | Mean<br>25                          | Mean<br>30                           | Range<br>12-84                         | Mean<br>31                            |
| Setting                  | Emergency department                | University sports clinic/ orthopedic center | Army medical center                 | Emergency department                 | Emergency department                   | Runners clinic                        |
| Suspected fracture type  | Femoral neck fracture               | Any fracture                                | Tibial stress fracture              | Any fracture                         | Ankle inversion injuries*              | Stress fractures in leg and feet      |
| <b>Reference test</b>    | X-ray                               | X-ray                                       | Bone scan                           | Bone scan                            | X-ray                                  | X-ray and bone scan                   |
| Time since symptom onset | Not reported                        | < 7 days old                                | Not reported                        | 0-10 days                            | Not reported                           | Not reported                          |

\* Patients had tested positive to the ‘Ottawa ankle rule’



**Table 2: Methodological quality of the included studies**

| Criterion                                                                                      | Bache <sup>7</sup><br>(1984) | Moore <sup>6</sup><br>(2009) | Lesho <sup>9</sup><br>(1997) | Kazemi <sup>8</sup><br>(2000) | Dissmann <sup>2</sup><br>(2006) | Wilder <sup>10</sup><br>(2008) |
|------------------------------------------------------------------------------------------------|------------------------------|------------------------------|------------------------------|-------------------------------|---------------------------------|--------------------------------|
| Consecutive or random sample                                                                   | Yes                          | Yes                          | Yes                          | Yes                           | Yes                             | Yes                            |
| Case-control study design avoided                                                              | Yes                          | Yes                          | Yes                          | Yes                           | Yes                             | Yes                            |
| Inappropriate exclusions avoided                                                               | Yes                          | Yes                          | Yes                          | Yes                           | Yes                             | Yes                            |
| Index test interpreted blind and independent of reference standard/<br>Pre-specified threshold | Unclear                      | Yes                          | Yes                          | Yes                           | Yes                             | Unclear                        |
| Appropriate reference standard                                                                 | Yes                          | Yes                          | Yes                          | Yes                           | Yes                             | Yes                            |
| Reference standard interpreted blind and independent of index test                             | Unclear                      | Unclear                      | Unclear                      | Yes                           | Yes                             | Unclear                        |
| Appropriate interval between index test and reference standard                                 | Not reported                 | Not reported                 | Within 30 days               | Not reported                  | Not reported                    | Not reported                   |
| All patients received a reference standard/<br>same reference standard                         | Yes                          | Yes                          | No                           | Yes                           | Yes                             | No                             |
| All patients included in the analysis                                                          | Yes                          | Yes                          | No                           | Yes                           | Yes                             | No                             |

**Table 3: Overview of the results of the included studies**

| Results of testing                 | Bache <sup>7</sup><br>(1984) | Moore <sup>6</sup><br>(2009) | Lesho <sup>9</sup><br>(1997) | Kazemi <sup>2</sup><br>(2000) |                     | Dissmann <sup>8</sup><br>(2006) |                     | Wilder <sup>10</sup><br>(2008) |                    |                     |
|------------------------------------|------------------------------|------------------------------|------------------------------|-------------------------------|---------------------|---------------------------------|---------------------|--------------------------------|--------------------|---------------------|
| Type of tuning fork                | 128Hz                        | 128Hz                        | 128Hz                        | 128Hz                         | 256Hz               | 128Hz<br>TLM                    | 128Hz<br>DFS        | 128Hz                          | 256Hz              | 512Hz               |
| Prevalence of fractures            | 56%                          | 32%                          | 61%                          | 80%                           | 80%                 | 10%                             | 10%                 | 27%                            | 27%                | 27%                 |
| Sensitivity (%; 95% CI)            | 91<br>(81-96)                | 83<br>(55-95)                | 75<br>(57-87)                | 89<br>(75-96)                 | 89<br>(75-96)       | 92<br>(52-99)                   | 92<br>(52-99)       | 83<br>(55-95)                  | 92<br>(67-99)      | 77<br>(49-92)       |
| Specificity (%; 95% CI)            | 18<br>(9-32)                 | 80<br>(61-91)                | 67<br>(44-84)                | 44<br>(19-73)                 | 44<br>(19-73)       | 61<br>(46-74)                   | 94<br>(84-98)       | 37<br>(23-55)                  | 19<br>(9-36)       | 64<br>(47-79)       |
| Diagnostic Odd ratio               | 2.3<br>(0.7-7.5)             | 20.0<br>(3.3-122)            | 6.0<br>(1.6-22)              | 6.6<br>(1.2-35.2)             | 6.6<br>(1.2-35.2)   | 17.3<br>(0.9-332)               | 187.0<br>(7.9-4424) | 3.0<br>(0.6-16.1)              | 2.9<br>(0.3-26.7)  | 6.1<br>(1.4-26.7)   |
| Positivelikelihood ratio: (95% CI) | 1.1<br>(0.94-1.3)            | 4.2<br>(1.8-9.5)             | 2.2<br>(1.1-4.5)             | 1.6<br>(0.89-2.9)             | 1.6<br>(0.89-2.91)  | 2.4<br>(1.5-3.7)                | 16.5<br>(4.8-56)    | 1.3<br>(0.92-1.9)              | 1.1<br>(0.91-1.4)  | 2.2<br>(1.2-3.8)    |
| Negativelikelihood ratio: (95% CI) | 0.49<br>(0.17-1.4)           | 0.21<br>(0.06-0.75)          | 0.37<br>(0.18-0.77)          | 0.24<br>(0.08-0.79)           | 0.24<br>(0.08-0.79) | 0.14<br>(0.01-2.0)              | 0.09<br>(0.01-1.3)  | 0.45<br>(0.12-1.7)             | 0.39<br>(0.05-3.0) | 0.36<br>(0.13-0.99) |

TLM- tip of lateral malleolus ; DFS- distal fibula shaft

## Acknowledgements

We extend our gratitude to Sarah Thorning (Trial search coordinator, Bond University) for valuable help in literature search and Elaine Beller (Statistician, Bond University) for statistical support.

## Contributorship Statement

KM, JD, BK, PG contributed to the concepts of the work and acquisition, analysis and interpretation of data. KM drafted the work. JD, BK, PG revised the work critically for important intellectual content. All authors approved the final version.

## Competing interest

The authors have declared no competing interest

**Funding** Kayalvili Mugunthan is supported by a Primary Health Care Research Evaluation & Development (PHCRED) fellowship, Bond University

**Data Sharing** No additional data available

## Figures and Tables

Figure 1: Flow chart of studies included in the review.

Figure 2: Sensitivity versus 1-specificity (ROC) plot of included studies.

Table 1: Characteristics of the included studies

Table 2: Methodological quality of the included studies

Table 3: Overview of the results of the included studies

## References:

1 Weisberg JL. Evaluation of bone continuity by sound conduction. *Bulletin of the United States Army Medical Department*. 1945;4:471-4

2 Kazemi M, Roscoe MW. Is the tuning fork test a reliable tool in detecting acute simple fractures? *International Sports Journal*. 2000 Summer;4(2):1-8.

3 <http://www.stats.org.uk/statistical-inference/Newcombe1998.pdf> Accessed on 5th July 2014

4 Simel DL, Samsa GP, Matchar DB. Likelihood ratios with confidence: sample size estimation for diagnostic test studies. *Journal of Clinical Epidemiology*. 1991;44:763-70.

1  
2  
3 5 Whiting P, Rutjesw AW, Westwood M, et al.Updating QUADAS: evidence to inform the  
4 development of QUADAS-2. 2010.Accessed at  
5 [www.bris.ac.uk/quadas/resources/quadas2reportv4.pdf](http://www.bris.ac.uk/quadas/resources/quadas2reportv4.pdf) on 5 July 2014.  
6  
7

8 6 Moore MB. The use of a tuning fork and stethoscope to identify fractures.*Journal of Athletic*  
9 *Training*. 2009;44(3):272-4.  
10

11 7 Bache JB, Cross AB. The Barford test. A useful diagnostic sign in fractures of the femoral  
12 neck. *Practitioner*.1984;228(1389):305-8.  
13  
14

15 8 Dissmann PD, Han KH. The tuning fork test: a useful tool for improving specificity in  
16 “Ottawa positive” patients after ankle inversion injury. *Emerg Med J*. 2006;23(10):788– 90.  
17  
18

19 9 Lesho EP. Can tuning forks replace bone scans for identification of tibial stress fractures? *Mil*  
20 *Med*.1997;162(12):802-3.  
21

22 10 Wilder RP, Vincent HK, Stewart J et al. Clinical Use of Tuning Forks to Identify Running-  
23 Related Stress Fractures. *Athletic Training & Sports Health Care: The Journal for the Practicing*  
24 *Clinician*. 2009;1(1):12-8.  
25  
26

27 11.Schneiders AG, Sullivan SJ, Hendrick PA et al. The ability of clinical tests to diagnose stress  
28 fractures: a systematic review and meta-analysis. *J Orthop Sports Phys Ther*. 2012;42(9):760-71.  
29  
30  
31  
32  
33  
34  
35  
36  
37  
38  
39  
40  
41  
42  
43  
44  
45  
46  
47  
48  
49  
50  
51  
52  
53  
54  
55  
56  
57  
58  
59  
60

1  
2  
3  
4  
5  
6  
7  
8  
9  
10  
11  
12  
13  
14  
15  
16  
17  
18  
19  
20  
21  
22  
23  
24  
25  
26  
27  
28  
29  
30  
31  
32  
33  
34  
35  
36  
37  
38  
39  
40  
41  
42  
43  
44  
45  
46  
47  
48  
49  
50  
51  
52  
53  
54  
55  
56  
57  
58  
59  
60

|

For peer review only

1  
2  
3  
4  
5  
6  
7  
8  
9  
10  
11  
12  
13  
14  
15  
16  
17  
18  
19  
20  
21  
22  
23  
24  
25  
26  
27  
28  
29  
30  
31  
32  
33  
34  
35  
36  
37  
38  
39  
40  
41  
42  
43  
44  
45  
46  
47  
48  
49  
50  
51  
52  
53  
54  
55  
56  
57  
58  
59  
60

Figure 1: Flowchart of studies included in the review

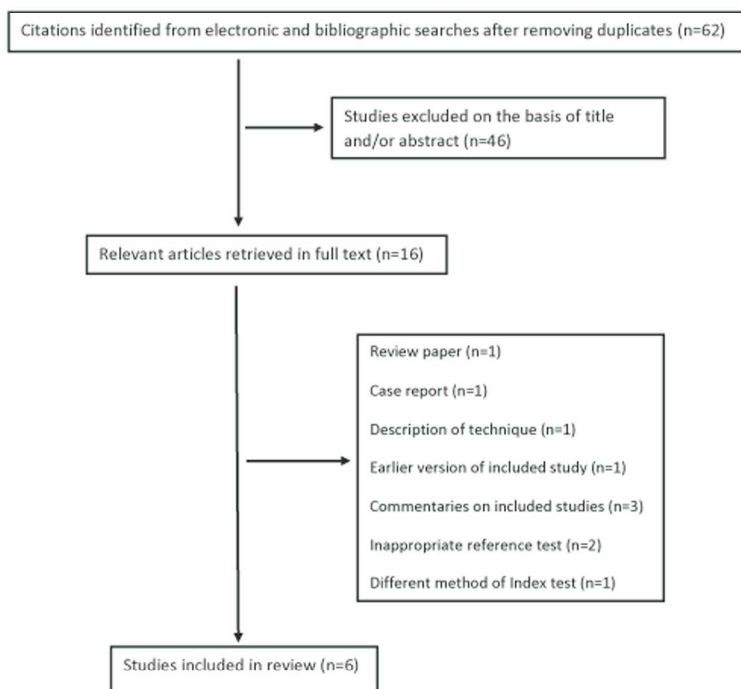

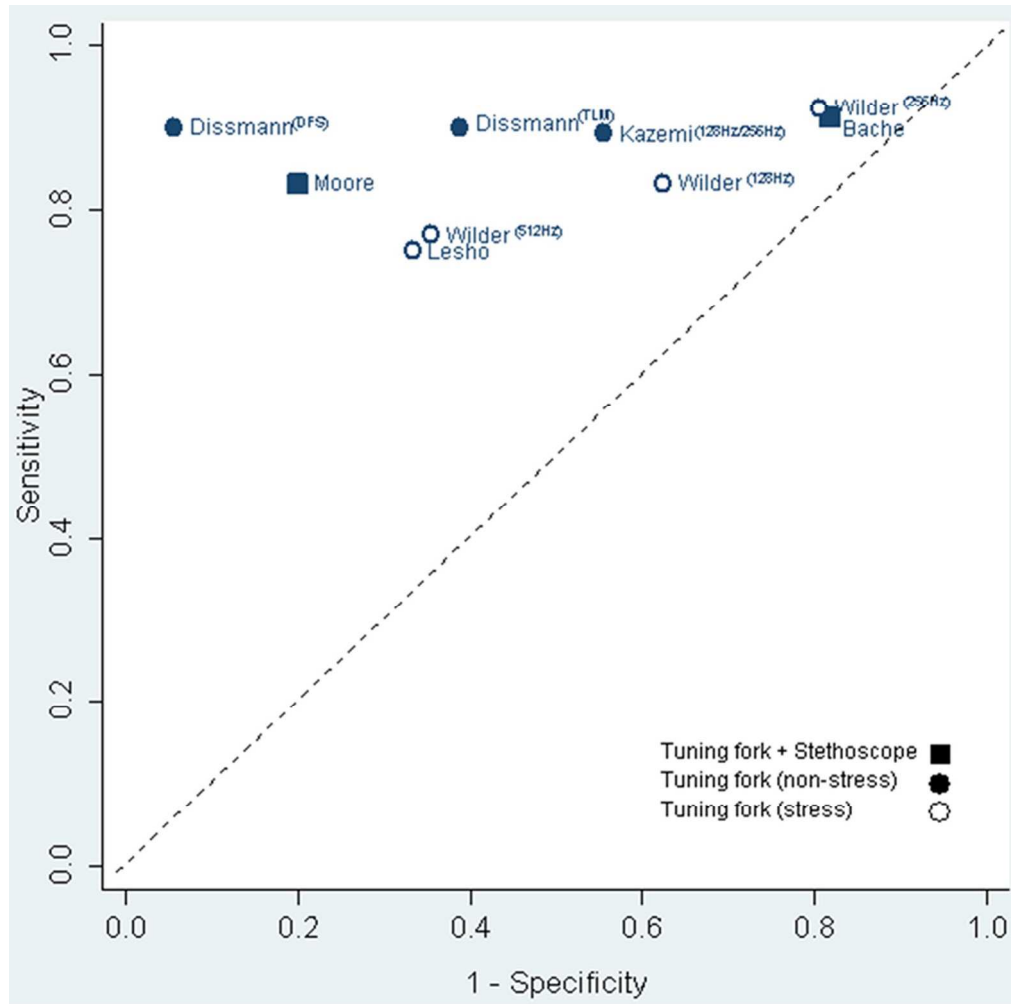

Only

1  
2  
3  
4  
5  
6  
7  
8  
9  
10  
11  
12  
13  
14  
15  
16  
17  
18  
19  
20  
21  
22  
23  
24  
25  
26  
27  
28  
29  
30  
31  
32  
33  
34  
35  
36  
37  
38  
39  
40  
41  
42  
43  
44  
45  
46  
47  
48  
49  
50  
51  
52  
53  
54  
55  
56  
57  
58  
59  
60



# PRISMA 2009 Checklist

| Section/topic                      | #  | Checklist item                                                                                                                                                                                                                                                                                              | Reported on page # |
|------------------------------------|----|-------------------------------------------------------------------------------------------------------------------------------------------------------------------------------------------------------------------------------------------------------------------------------------------------------------|--------------------|
| <b>TITLE</b>                       |    |                                                                                                                                                                                                                                                                                                             |                    |
| Title                              | 1  | Identify the report as a systematic review, meta-analysis, or both.                                                                                                                                                                                                                                         | 1                  |
| <b>ABSTRACT</b>                    |    |                                                                                                                                                                                                                                                                                                             |                    |
| Structured summary                 | 2  | Provide a structured summary including, as applicable: background; objectives; data sources; study eligibility criteria, participants, and interventions; study appraisal and synthesis methods; results; limitations; conclusions and implications of key findings; systematic review registration number. | 2                  |
| <b>INTRODUCTION</b>                |    |                                                                                                                                                                                                                                                                                                             |                    |
| Rationale                          | 3  | Describe the rationale for the review in the context of what is already known.                                                                                                                                                                                                                              | 3                  |
| Objectives                         | 4  | Provide an explicit statement of questions being addressed with reference to participants, interventions, comparisons, outcomes, and study design (PICOS).                                                                                                                                                  | 3                  |
| <b>METHODS</b>                     |    |                                                                                                                                                                                                                                                                                                             |                    |
| Protocol and registration          | 5  | Indicate if a review protocol exists, if and where it can be accessed (e.g., Web address), and, if available, provide registration information including registration number.                                                                                                                               | nil                |
| Eligibility criteria               | 6  | Specify study characteristics (e.g., PICOS, length of follow-up) and report characteristics (e.g., years considered, language, publication status) used as criteria for eligibility, giving rationale.                                                                                                      | 3                  |
| Information sources                | 7  | Describe all information sources (e.g., databases with dates of coverage, contact with study authors to identify additional studies) in the search and date last searched.                                                                                                                                  | 3-4                |
| Search                             | 8  | Present full electronic search strategy for at least one database, including any limits used, such that it could be repeated.                                                                                                                                                                               | 3-4                |
| Study selection                    | 9  | State the process for selecting studies (i.e., screening, eligibility, included in systematic review, and, if applicable, included in the meta-analysis).                                                                                                                                                   | 4                  |
| Data collection process            | 10 | Describe method of data extraction from reports (e.g., piloted forms, independently, in duplicate) and any processes for obtaining and confirming data from investigators.                                                                                                                                  | 4                  |
| Data items                         | 11 | List and define all variables for which data were sought (e.g., PICOS, funding sources) and any assumptions and simplifications made.                                                                                                                                                                       | 4,<br>QUADAS-2     |
| Risk of bias in individual studies | 12 | Describe methods used for assessing risk of bias of individual studies (including specification of whether this was done at the study or outcome level), and how this information is to be used in any data synthesis.                                                                                      | 9,<br>QUADAS-2     |
| Summary measures                   | 13 | State the principal summary measures (e.g., risk ratio, difference in means)                                                                                                                                                                                                                                | 20                 |



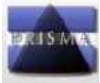

# PRISMA 2009 Checklist

|                      |    |                                                                                                                                                           |               |
|----------------------|----|-----------------------------------------------------------------------------------------------------------------------------------------------------------|---------------|
| Synthesis of results | 14 | Describe the methods of handling data and combining results of studies, if done, including measures of consistency (e.g., $I^2$ ) for each meta-analysis. | 4, 5 and Fig2 |
|----------------------|----|-----------------------------------------------------------------------------------------------------------------------------------------------------------|---------------|

Page 1 of 2

| Section/topic                 | #  | Checklist item                                                                                                                                                                                                                                                                                  | Reported on page #                                    |
|-------------------------------|----|-------------------------------------------------------------------------------------------------------------------------------------------------------------------------------------------------------------------------------------------------------------------------------------------------|-------------------------------------------------------|
| Risk of bias across studies   | 15 | Specify any assessment of risk of bias that may affect the cumulative evidence (e.g., publication bias, selective reporting within studies).                                                                                                                                                    | 9 , TABLE 2                                           |
| Additional analyses           | 16 | Describe methods of additional analyses (e.g., sensitivity or subgroup analyses, meta-regression), if done, indicating which were pre-specified.                                                                                                                                                | TABLE 3, Fig2                                         |
| <b>RESULTS</b>                |    |                                                                                                                                                                                                                                                                                                 |                                                       |
| Study selection               | 17 | Give numbers of studies screened, assessed for eligibility, and included in the review, with reasons for exclusions at each stage, ideally with a flow diagram.                                                                                                                                 | 4, Fig 1                                              |
| Study characteristics         | 18 | For each study, present characteristics for which data were extracted (e.g., study size, PICOS, follow-up period) and provide the citations.                                                                                                                                                    | 4-5, TABLE 1                                          |
| Risk of bias within studies   | 19 | Present data on risk of bias of each study and, if available, any outcome level assessment (see item 12).                                                                                                                                                                                       | 9, TABLE 2                                            |
| Results of individual studies | 20 | For all outcomes considered (benefits or harms), present, for each study: (a) simple summary data for each intervention group (b) effect estimates and confidence intervals, ideally with a forest plot.                                                                                        | TABLE 3, Fig 2                                        |
| Synthesis of results          | 21 | Present results of each meta-analysis done, including confidence intervals and measures of consistency.                                                                                                                                                                                         | 10, TABLE 3, FIG 2                                    |
| Risk of bias across studies   | 22 | Present results of any assessment of risk of bias across studies (see Item 15).                                                                                                                                                                                                                 | 9, TABLE 2                                            |
| Additional analysis           | 23 | Give results of additional analyses, if done (e.g., sensitivity or subgroup analyses, meta-regression [see Item 16]).                                                                                                                                                                           | Fig 2                                                 |
| <b>DISCUSSION</b>             |    |                                                                                                                                                                                                                                                                                                 |                                                       |
| Summary of evidence           | 24 | Summarize the main findings including the strength of evidence for each main outcome; consider their relevance to key groups (e.g., healthcare providers, users, and policy makers).                                                                                                            | 5-6                                                   |
| Limitations                   | 25 | Discuss limitations at study and outcome level (e.g., risk of bias), and at review-level (e.g., incomplete retrieval of identified research, reporting bias).                                                                                                                                   | 5-6                                                   |
| Conclusions                   | 26 | Provide a general interpretation of the results in the context of other evidence, and implications for future research.                                                                                                                                                                         | 6                                                     |
| <b>FUNDING</b>                |    |                                                                                                                                                                                                                                                                                                 |                                                       |
| Funding                       | 27 | Describe sources of funding for the systematic review and other support (e.g., supply of data); role of funders for the systematic review.<br><i>For peer review only - <a href="http://bmjopen.bmj.com/site/about/guidelines.xhtml">http://bmjopen.bmj.com/site/about/guidelines.xhtml</a></i> | Primary Health Care Research Evaluation & Development |

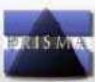

# PRISMA 2009 Checklist

1  
2  
3  
4  
5  
6  
7  
8  
9  
10  
11  
12  
13  
14  
15  
16  
17  
18  
19  
20  
21  
22  
23  
24  
25  
26  
27  
28  
29  
30  
31  
32  
33  
34  
35  
36  
37  
38  
39  
40  
41  
42  
43  
44  
45  
46  
47  
48  
49

|  |  |  |          |
|--|--|--|----------|
|  |  |  | (PHCRED) |
|--|--|--|----------|

From: Moher D, Liberati A, Tetzlaff J, Altman DG, The PRISMA Group (2009). Preferred Reporting Items for Systematic Reviews and Meta-Analyses: The PRISMA Statement. PLoS Med 6(6): e1000097. doi:10.1371/journal.pmed1000097

For more information, visit: [www.prisma-statement.org](http://www.prisma-statement.org).

Page 2 of 2

For peer review only

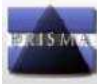

# PRISMA 2009 Checklist

| Section/topic                      | #  | Checklist item                                                                                                                                                                                                                                                                                              | Reported on page # |
|------------------------------------|----|-------------------------------------------------------------------------------------------------------------------------------------------------------------------------------------------------------------------------------------------------------------------------------------------------------------|--------------------|
| <b>TITLE</b>                       |    |                                                                                                                                                                                                                                                                                                             |                    |
| Title                              | 1  | Identify the report as a systematic review, meta-analysis, or both.                                                                                                                                                                                                                                         | 1                  |
| <b>ABSTRACT</b>                    |    |                                                                                                                                                                                                                                                                                                             |                    |
| Structured summary                 | 2  | Provide a structured summary including, as applicable: background; objectives; data sources; study eligibility criteria, participants, and interventions; study appraisal and synthesis methods; results; limitations; conclusions and implications of key findings; systematic review registration number. | 2                  |
| <b>INTRODUCTION</b>                |    |                                                                                                                                                                                                                                                                                                             |                    |
| Rationale                          | 3  | Describe the rationale for the review in the context of what is already known.                                                                                                                                                                                                                              | 3                  |
| Objectives                         | 4  | Provide an explicit statement of questions being addressed with reference to participants, interventions, comparisons, outcomes, and study design (PICOS).                                                                                                                                                  | 3                  |
| <b>METHODS</b>                     |    |                                                                                                                                                                                                                                                                                                             |                    |
| Protocol and registration          | 5  | Indicate if a review protocol exists, if and where it can be accessed (e.g., Web address), and, if available, provide registration information including registration number.                                                                                                                               | nil                |
| Eligibility criteria               | 6  | Specify study characteristics (e.g., PICOS, length of follow-up) and report characteristics (e.g., years considered, language, publication status) used as criteria for eligibility, giving rationale.                                                                                                      | 3                  |
| Information sources                | 7  | Describe all information sources (e.g., databases with dates of coverage, contact with study authors to identify additional studies) in the search and date last searched.                                                                                                                                  | 3-4                |
| Search                             | 8  | Present full electronic search strategy for at least one database, including any limits used, such that it could be repeated.                                                                                                                                                                               | 3-4                |
| Study selection                    | 9  | State the process for selecting studies (i.e., screening, eligibility, included in systematic review, and, if applicable, included in the meta-analysis).                                                                                                                                                   | 4                  |
| Data collection process            | 10 | Describe method of data extraction from reports (e.g., piloted forms, independently, in duplicate) and any processes for obtaining and confirming data from investigators.                                                                                                                                  | 4                  |
| Data items                         | 11 | List and define all variables for which data were sought (e.g., PICOS, funding sources) and any assumptions and simplifications made.                                                                                                                                                                       | 4,<br>QUADAS-2     |
| Risk of bias in individual studies | 12 | Describe methods used for assessing risk of bias of individual studies (including specification of whether this was done at the study or outcome level), and how this information is to be used in any data synthesis.                                                                                      | 9,<br>QUADAS-2     |
| Summary measures                   | 13 | State the principal summary measures (e.g., risk ratio, difference in means).                                                                                                                                                                                                                               | 20                 |
| Synthesis of results               | 14 | Describe the methods of handling data and combining results of studies, if done, including measures of consistency (e.g., $I^2$ ) for each meta-analysis.                                                                                                                                                   | 4, 5 and<br>Fig2   |



# PRISMA 2009 Checklist

| Section/topic                 | #  | Checklist item                                                                                                                                                                                           | Reported on page #                                             |
|-------------------------------|----|----------------------------------------------------------------------------------------------------------------------------------------------------------------------------------------------------------|----------------------------------------------------------------|
| Risk of bias across studies   | 15 | Specify any assessment of risk of bias that may affect the cumulative evidence (e.g., publication bias, selective reporting within studies).                                                             | 9, TABLE 2                                                     |
| Additional analyses           | 16 | Describe methods of additional analyses (e.g., sensitivity or subgroup analyses, meta-regression), if done, indicating which were pre-specified.                                                         | TABLE 3, Fig 2                                                 |
| <b>RESULTS</b>                |    |                                                                                                                                                                                                          |                                                                |
| Study selection               | 17 | Give numbers of studies screened, assessed for eligibility, and included in the review, with reasons for exclusions at each stage, ideally with a flow diagram.                                          | 4, Fig 1                                                       |
| Study characteristics         | 18 | For each study, present characteristics for which data were extracted (e.g., study size, PICOS, follow-up period) and provide the citations.                                                             | 4-5, TABLE 1                                                   |
| Risk of bias within studies   | 19 | Present data on risk of bias of each study and, if available, any outcome level assessment (see item 12).                                                                                                | 9, TABLE 2                                                     |
| Results of individual studies | 20 | For all outcomes considered (benefits or harms), present, for each study: (a) simple summary data for each intervention group (b) effect estimates and confidence intervals, ideally with a forest plot. | TABLE 3, Fig 2                                                 |
| Synthesis of results          | 21 | Present results of each meta-analysis done, including confidence intervals and measures of consistency.                                                                                                  | 10, TABLE 3, FIG 2                                             |
| Risk of bias across studies   | 22 | Present results of any assessment of risk of bias across studies (see Item 15).                                                                                                                          | 9, TABLE 2                                                     |
| Additional analysis           | 23 | Give results of additional analyses, if done (e.g., sensitivity or subgroup analyses, meta-regression [see Item 16]).                                                                                    | Fig 2                                                          |
| <b>DISCUSSION</b>             |    |                                                                                                                                                                                                          |                                                                |
| Summary of evidence           | 24 | Summarize the main findings including the strength of evidence for each main outcome; consider their relevance to key groups (e.g., healthcare providers, users, and policy makers).                     | 5-6                                                            |
| Limitations                   | 25 | Discuss limitations at study and outcome level (e.g., risk of bias), and at review-level (e.g., incomplete retrieval of identified research, reporting bias).                                            | 5-6                                                            |
| Conclusions                   | 26 | Provide a general interpretation of the results in the context of other evidence, and implications for future research.                                                                                  | 6                                                              |
| <b>FUNDING</b>                |    |                                                                                                                                                                                                          |                                                                |
| Funding                       | 27 | Describe sources of funding for the systematic review and other support (e.g., supply of data); role of funders for the systematic review.                                                               | Primary Health Care Research Evaluation & Development (PHCRED) |
